# Supplementary material for: Synthesis and characterization of novel uranyl clusters supported by bis(pyrazolyl) methane ligands: biomimetic catalytic oxidation, BSA protein interaction and cytotoxicity studies
Source: Royal Society of Chemistry journal article supplement (doi:10.1039/d4ra06347c), 2024-01-01
Supplement: d4ra06347c1.pdf [file d4ra06347c1.pdf]

### Supplementary Information

## **Synthesis and characterization of novel uranyl clusters supported by bis(pyrazolyl) methane ligands: biomimetic catalytic oxidation, BSA protein interaction and cytotoxicity studies**

Nakul S.<sup>a</sup>, Bhagavathish R.<sup>a</sup>, Naveen V. Kulkarni<sup>a\*</sup>, Ajeetkumar Patil<sup>b\*</sup>, Suresh B. Arakera<sup>c</sup> Sam John<sup>d</sup>,

<sup>a</sup> *Department of Chemistry, Amrita Vishwa Vidyapeetham, Amritapuri - 690525, Kollam, Kerala, INDIA*

<sup>b</sup> *Department of Atomic and Molecular Physics, Manipal Academy of Higher Education (MAHE), Manipal - 576 104, Karnataka, INDIA*

<sup>c</sup> *Department of Applied Genetics, Karnatak University, Pavatenagar, Dharwad -580003, Karnataka, INDIA*

<sup>d</sup> *Research and Post Graduate Department of Chemistry, St. Berchmans College, Changanassery, Kottayam - 686101, Kerala, INDIA*

*Corresponding authors: [naveenvkulkarni@am.amrita.edu](mailto:naveenvkulkarni@am.amrita.edu) (NVK); [ajeetkumar.p@manipal.edu](mailto:ajeetkumar.p@manipal.edu) (AP)*

### **Materials and Instrumentation**

All the chemicals including the ligand precursors, metal salts and solvents were purchased from commercial sources, Sigma-Aldrich (Merck), Sd-fine and Nice Chemicals and used as received. Conductivity measurements were done using ELICO-CM-82 bridge. The IR spectra were recorded using Perkin Elmer FTIR instrument in the range 4000 - 500 cm<sup>-1</sup>. The <sup>1</sup>H NMR spectra of the ligand (in CDCl<sub>3</sub>) and complexes (in DMSO-d<sub>6</sub>) were recorded on Joel ECZ 500 MHz spectrometer at room temperature. The respective chemical shifts were referenced to solvent residue resonances and are reported relative to trimethylsilane. The UV-Visible spectra were recorded on a SHIMADZU-1800 UV-VIS spectrophotometer. The mass spectra of the complexes were recorded using Micromass QTOF ESI-MS instrument (model HAB273). The single crystal x-ray studies were done using Bruker APEX-II CCD machine. The NIR spectra were analysed using

Perkin Elmer Lambda 1050 S. The PXRD analysis was carried out in Rigaku ultima IV and Raman spectra were analysed using Renishaw Raman spectrophotometer.

### **Handling and Disposing Uranyl acetate**

The compound is stored in a closed container in a cool and well-ventilated area. Protective gears are used while handling the chemicals. The reactions are done in an isolated area. The reaction wastes are separated and stored in a sealed container and disposed safely. All the stock solutions are labelled with radiation warning sign.

### **Synthesis of ligands**

Bis(pyrazolyl) methane (**L1**) and bis (3,5-dimethyl pyrazolyl) methane (**L2**) were prepared by following the reported procedure with slight modifications as described below <sup>1</sup>.

73.5 mmol of the corresponding pyrazole, taken in a round bottom flask was dissolved in 30 ml of DMSO and 16.46 g (294 mmol) of finely powdered KOH was added. The mixture was stirred for 1 hour at 60-65 C and then 36.8 mmol (2.6 ml) of dibromomethane dissolved in 20 ml of DMSO was added dropwise over 30 min. The content was stirred overnight and slowly decanted into a beaker, all the solid content was dissolved in minimum amount of water and stirred at 60-65 C for another 4h. Later the reaction mixture was decanted into the beaker containing 300 mL of water and extracted with chloroform (5 × 30 ml). Extract was washed thoroughly with water (3 × 30 ml), dried over calcium chloride and evaporated under vacuum to obtain the ligand as a colourless solid.

#### **Bis(pyrazolyl) methane (L1)**

Yield 84%; M.P. 107–108 ° C; IR (ATR, selected, cm<sup>-1</sup>) 2978 (w), 2919 (w), 1555 (s), 1461 (s), 1417 (m), 1381 (s), 1352 (s), 1266 (s), 1138 (m), 1033 (m), 969 (m), 804 (m), 775 (s); UV-Vis (MeOH) ( $\lambda_{\text{max}}$  in nm (log  $\epsilon$  in dm<sup>3</sup> mol<sup>-1</sup> cm<sup>-1</sup>)) 217 (4.32), 235 (4.46); <sup>1</sup>H NMR (CDCl<sub>3</sub>, 500 MHz, 298 K, ppm)  $\delta$  7.62 (2H, d (J = 3Hz), 5-CH<sub>pz</sub>), 7.52 (2H, d (J = 3Hz), 3-CH<sub>pz</sub>), 6.27 (2H, s, CH<sub>2</sub>),

6.26 (2H, t (J = 3Hz), 4-CH<sub>pz</sub>); <sup>13</sup>C NMR (CDCl<sub>3</sub>, 125 MHz, 298 K, ppm) δ = 139.7 (3-CH<sub>pz</sub>), 128.6 (5-CH<sub>pz</sub>), 106.0 (4-CH<sub>pz</sub>), 64.0 (CH<sub>2</sub>). Elemental Analysis for C<sub>7</sub>H<sub>8</sub>N<sub>4</sub>, Calcd(found) C 56.74 (56.43), H 5.44 (5.32), N, 37.81 (38.12) %.

### Bis (3,5-dimethyl pyrazolyl) methane (L2)

Yield 92%; M.P. 75-80 °C; IR (ATR, selected, cm<sup>-1</sup>) 3203 (b), 3062 (w), 1625 (s), 1578 (s), 1552 (s), 1456 (s), 1425 (s), 1374 (m), 1141 (w), 1099 (m); UV-Vis (MeOH) 228 (3.08), 256 (2.52) <sup>1</sup>H NMR (CDCl<sub>3</sub>, 500 MHz, 298 K, ppm) δ ; <sup>13</sup>C NMR (CDCl<sub>3</sub>, 125 MHz, 298 K, ppm) δ = 160.1, 153.1, 148.7, 139.3, 135.5, 132.8, 123.6, 122.9, 121.3; Elemental Analysis for C<sub>11</sub>H<sub>16</sub>N<sub>4</sub>, Calcd (found) C 64.68 (64.38), H 7.90 (7.46), N, 27.43 (27.82)%.

### IR Spectral analysis

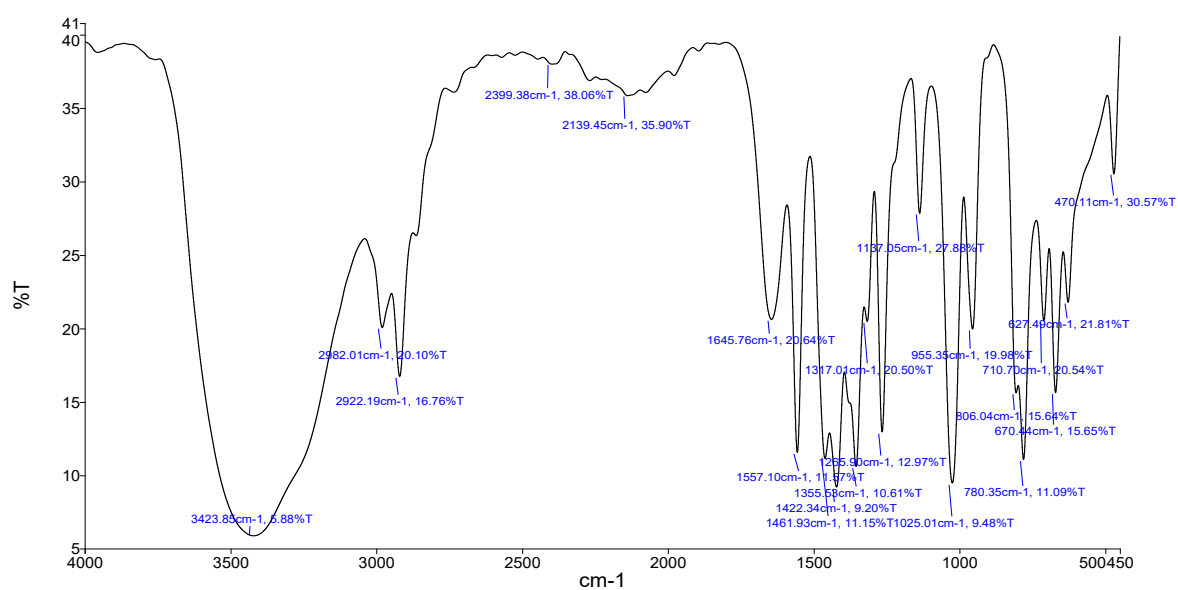

Fig 1S: IR spectrum of the ligand L1

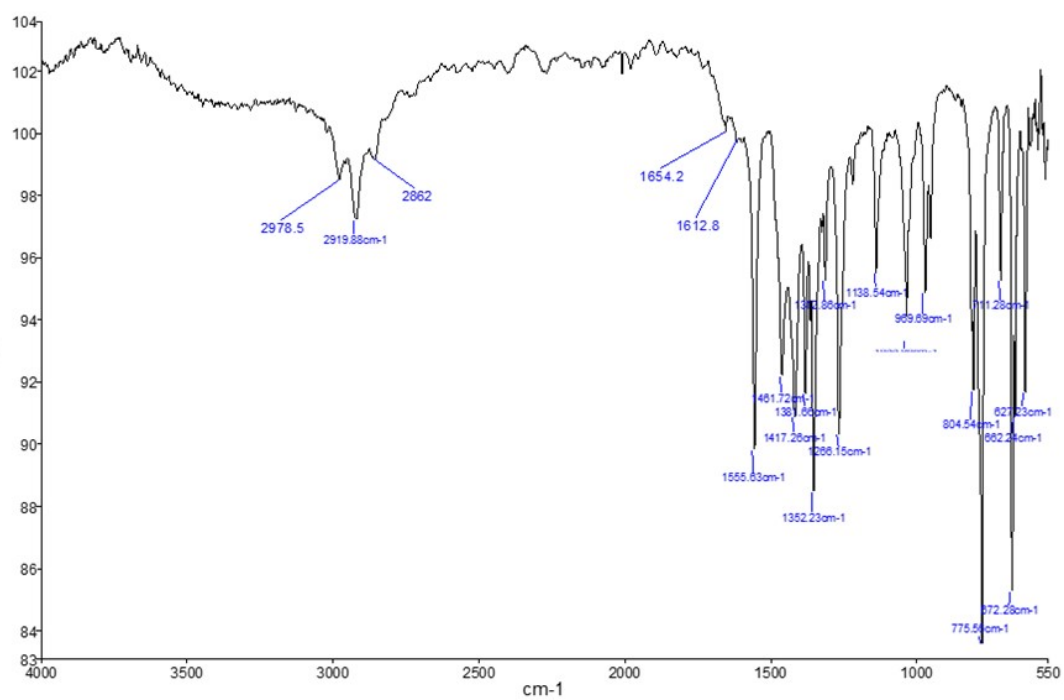

Fig 2S: IR spectrum of the ligand L2

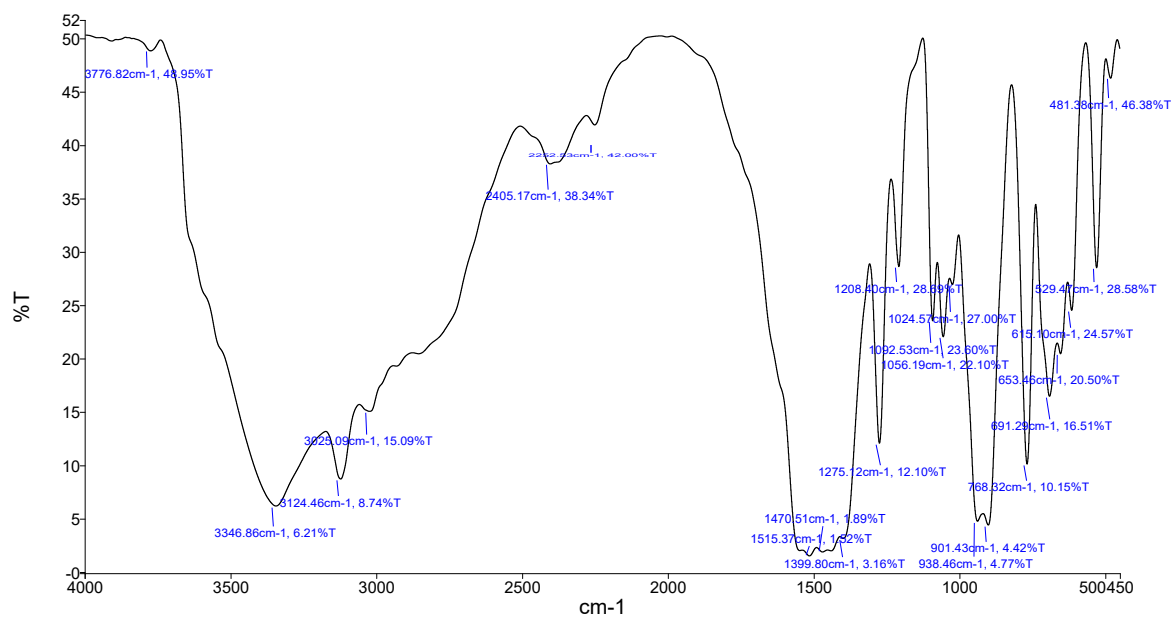

Fig 3S: IR spectrum of the complex C1

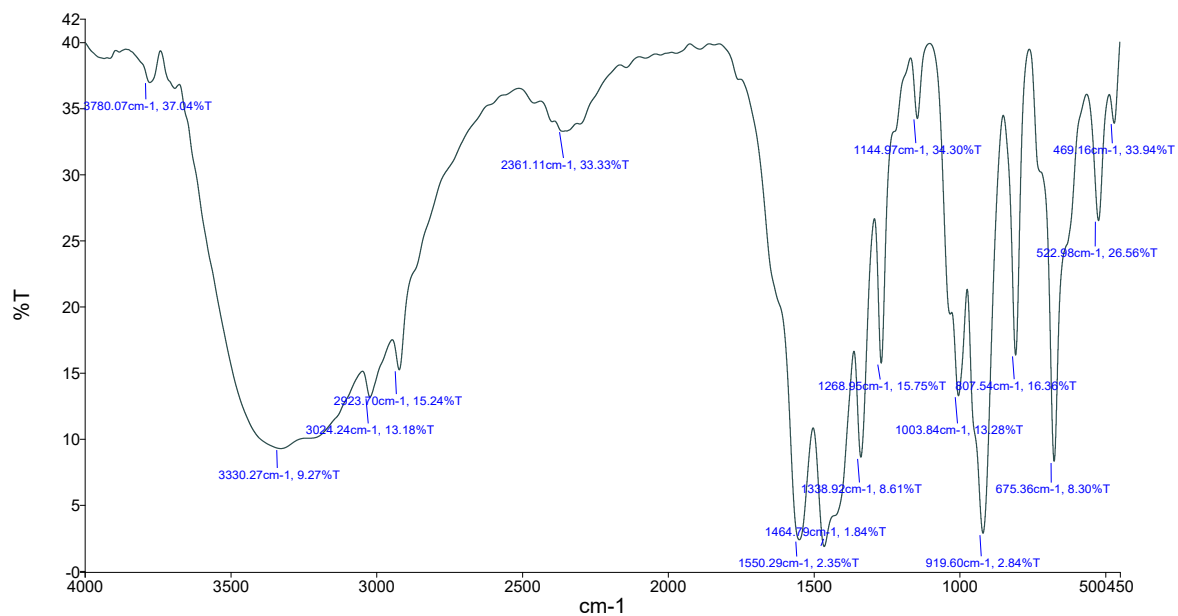

Fig 4S: IR spectrum of the complex C2

### UV-Vis spectral analysis

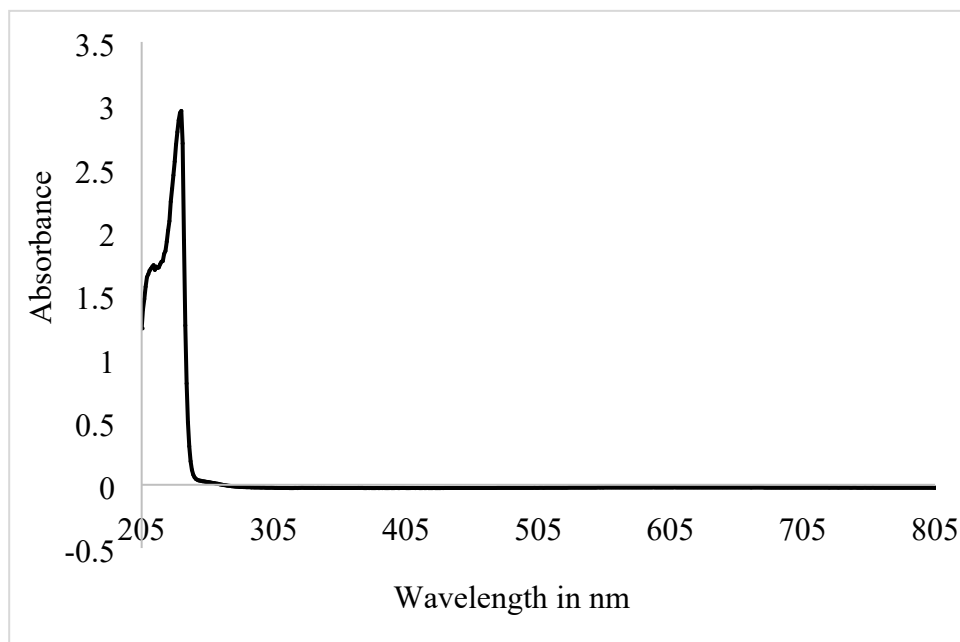

Fig 5S: Absorption spectrum of the ligand L1

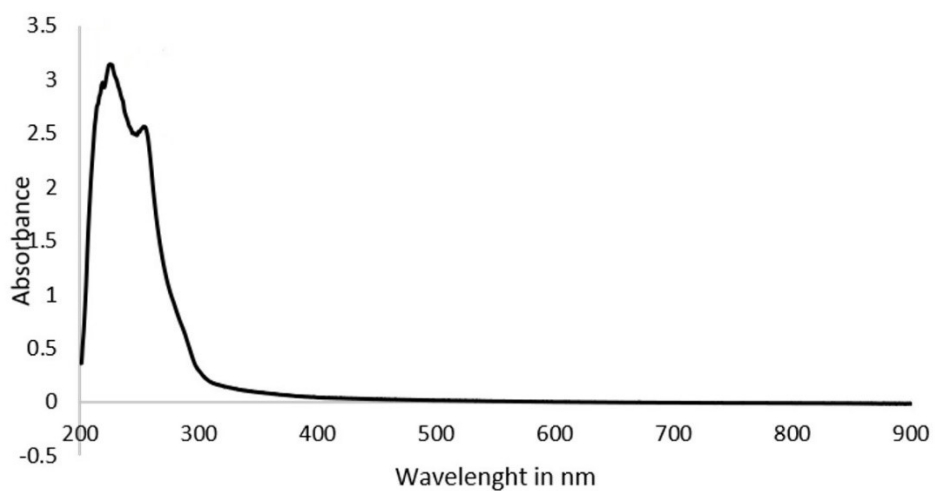

Fig 6S: Absorption spectrum of the ligand L2

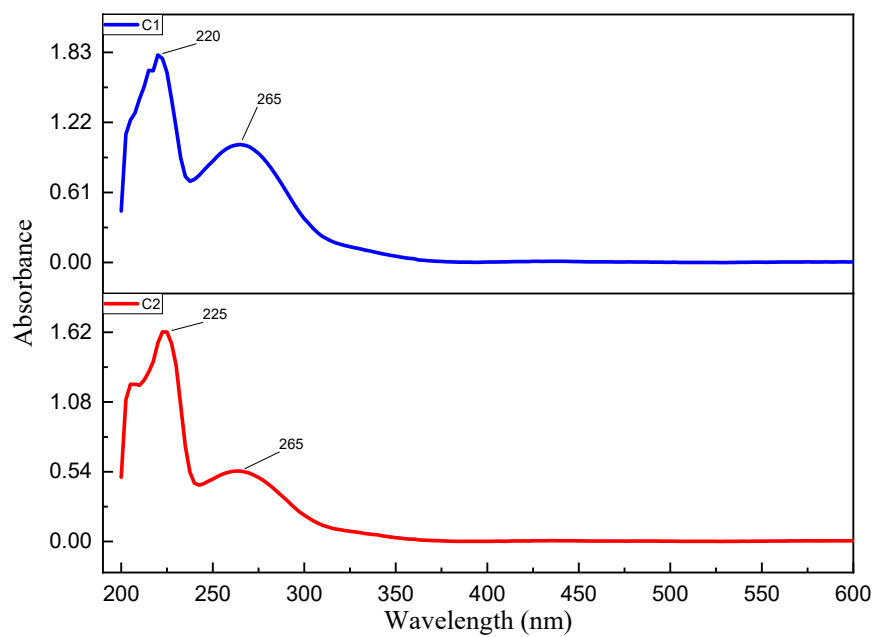

Fig 7S: Absorption spectra of the complexes C1 and C2.

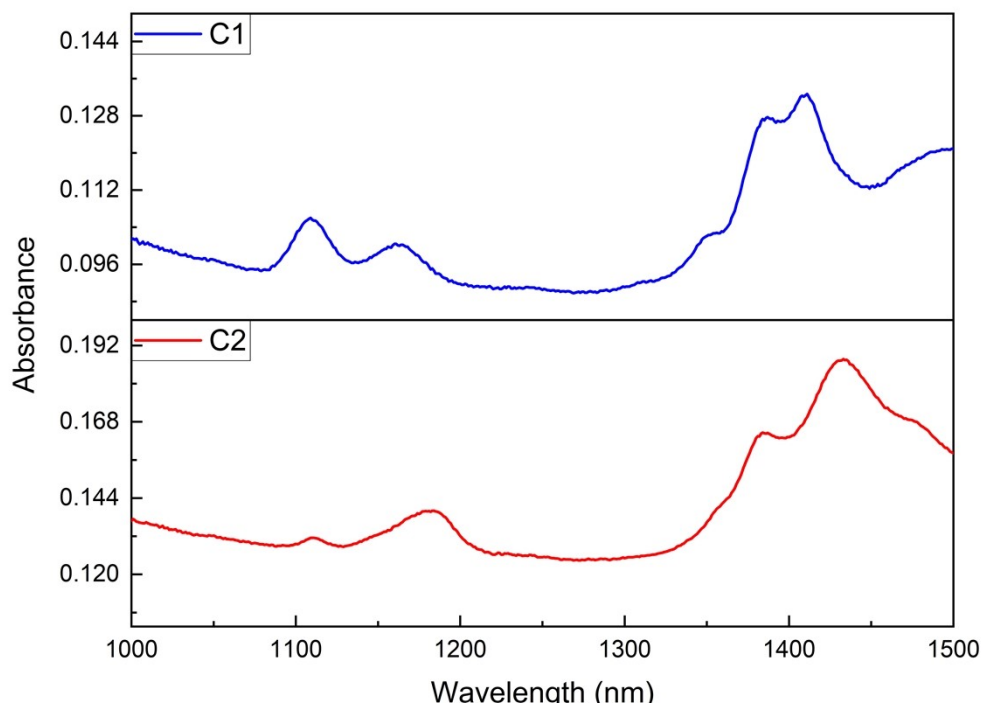

Fig 8S: NIR spectra of the complexes **C1** and **C2**.

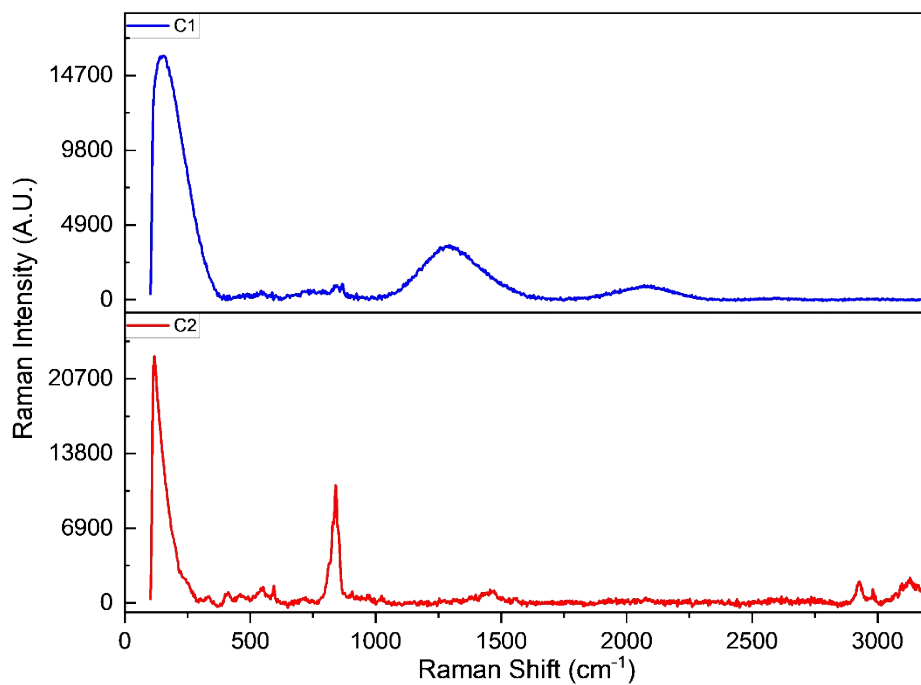

Fig 9S: Raman spectra of the complexes **C1** and **C2**.

## Calculation of optical bandgap

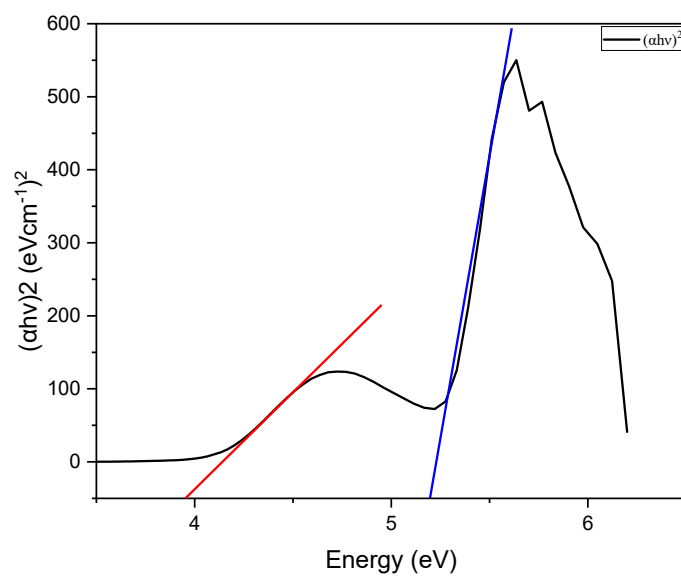

Fig 10S: Tauc plot for complex C1 (determination of direct bandgap)

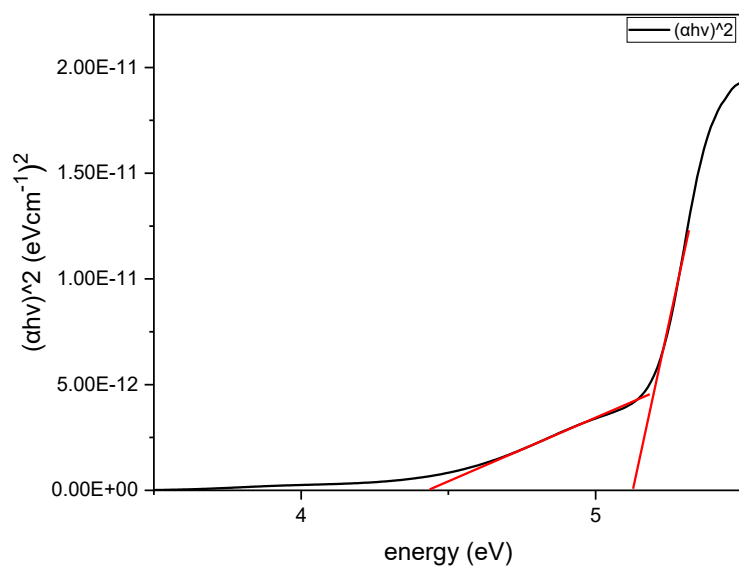

Fig 11S: Tauc plot for complex C2 (determination of direct bandgap)



# NMR Spectral analysis

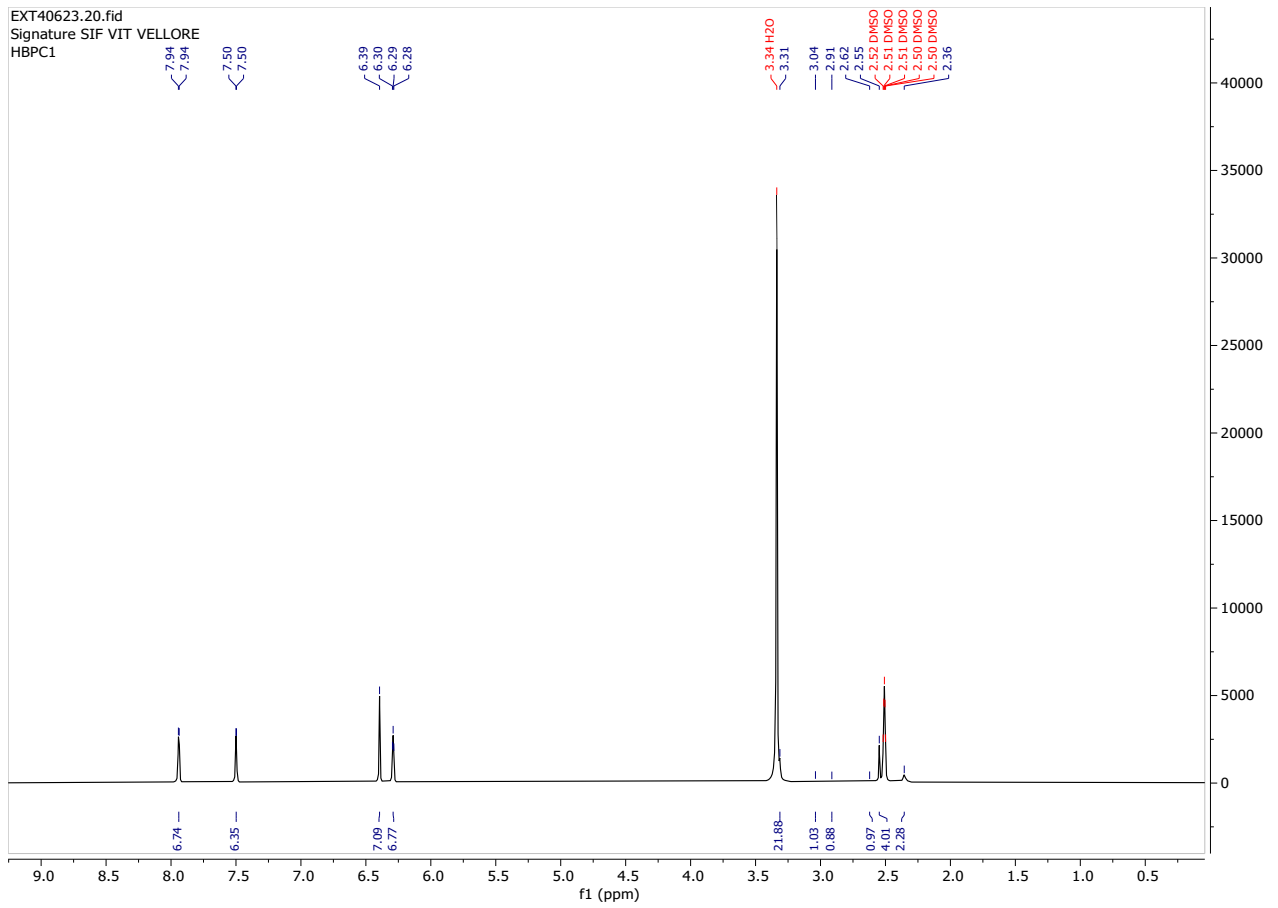

Fig 12S: <sup>1</sup>H NMR spectrum of complex C1

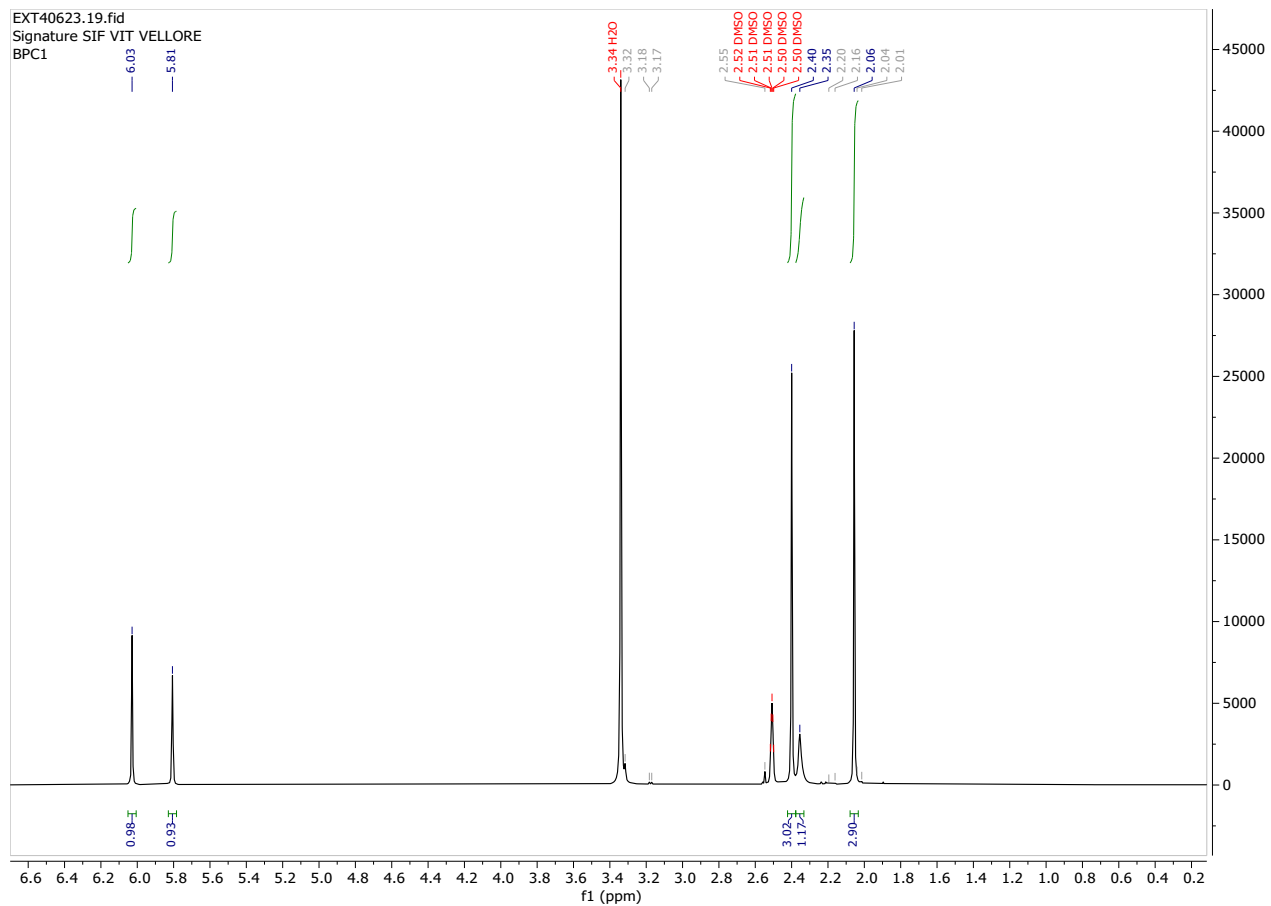

Fig 13S: <sup>1</sup>H NMR spectrum of complex C2

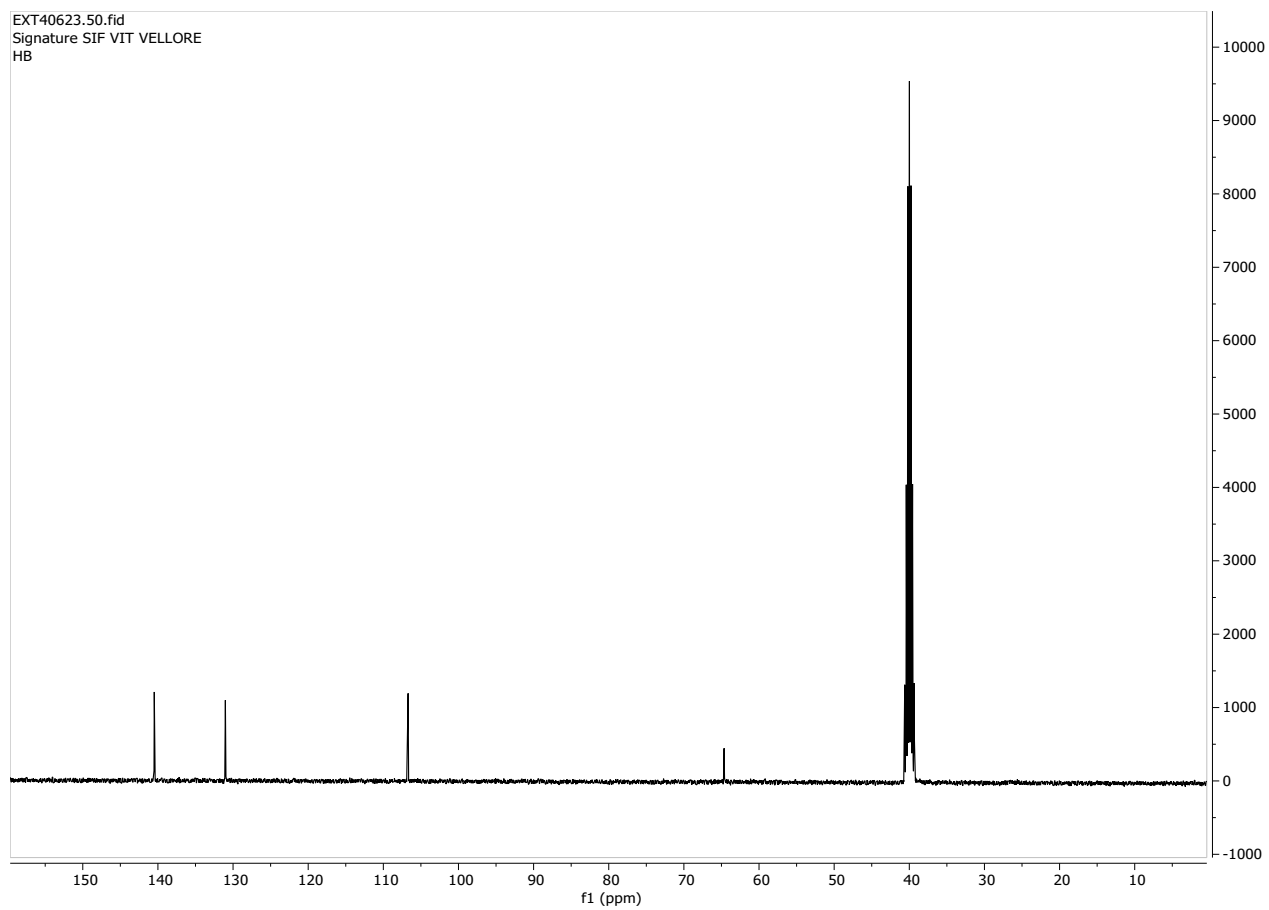

Fig 14S:  $^{13}\text{C}\{^1\text{H}\}$  NMR spectrum of complex C1

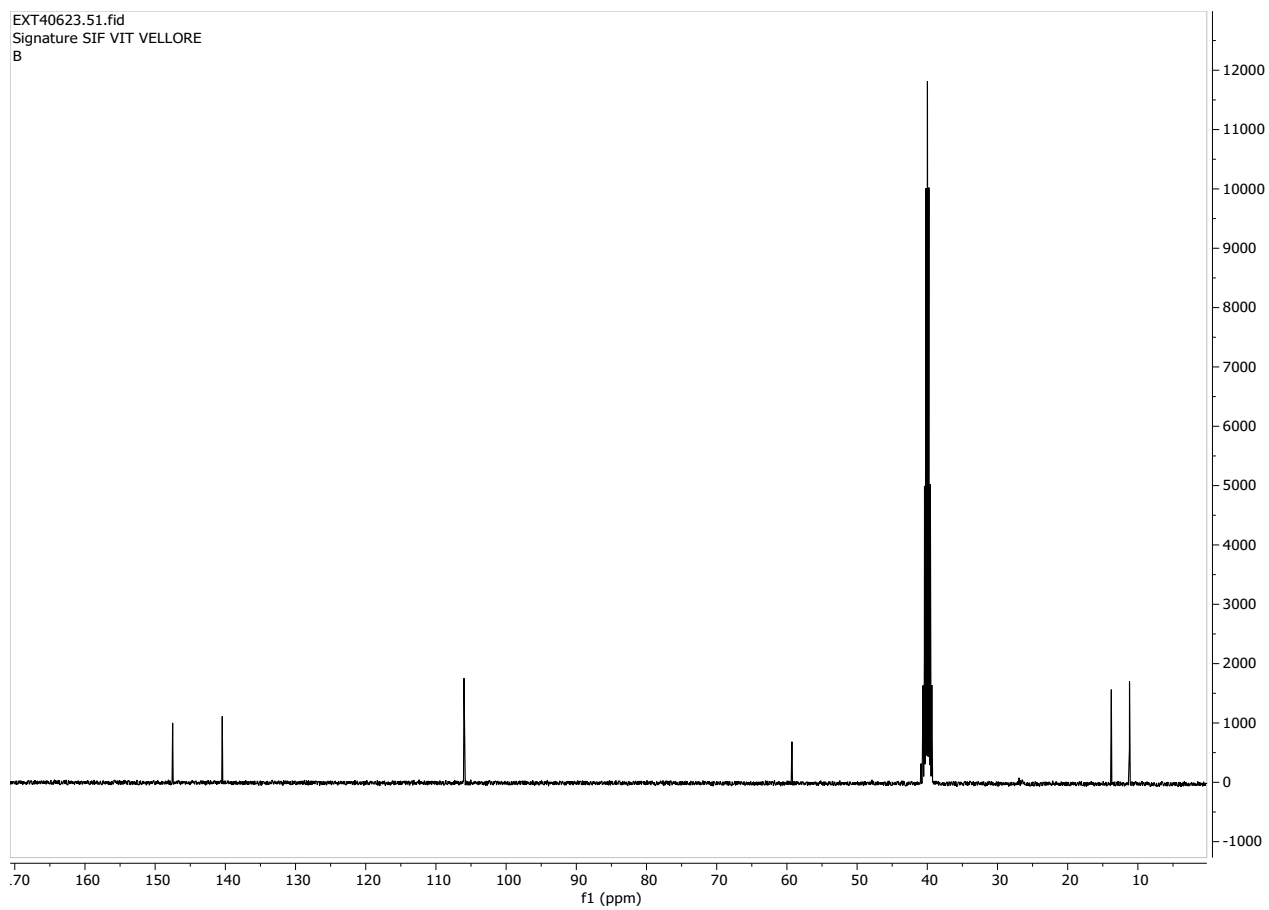

Fig 15S:  $^{13}\text{C}\{^1\text{H}\}$  NMR spectrum of complex C2

# Mass analysis

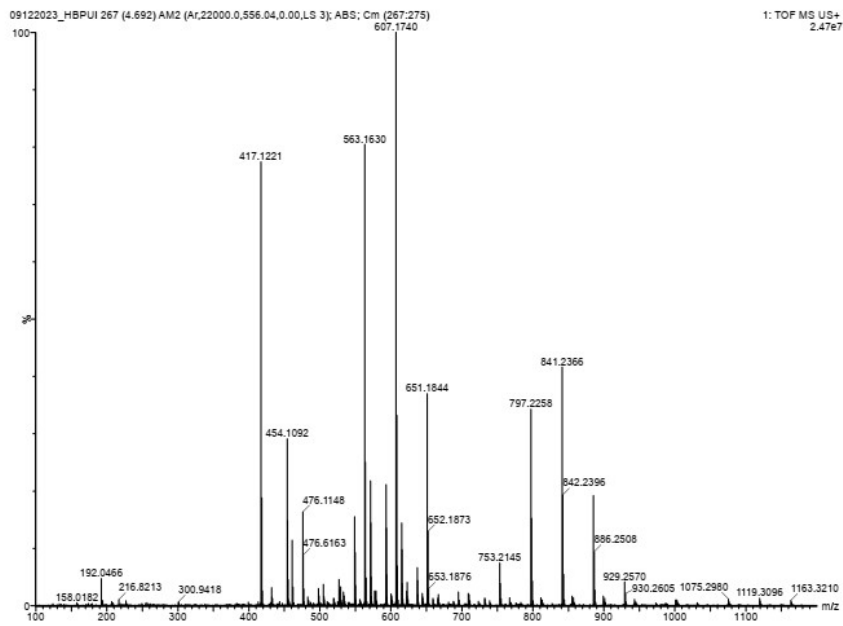

Figure 16S: Mass spectrum of complex C1

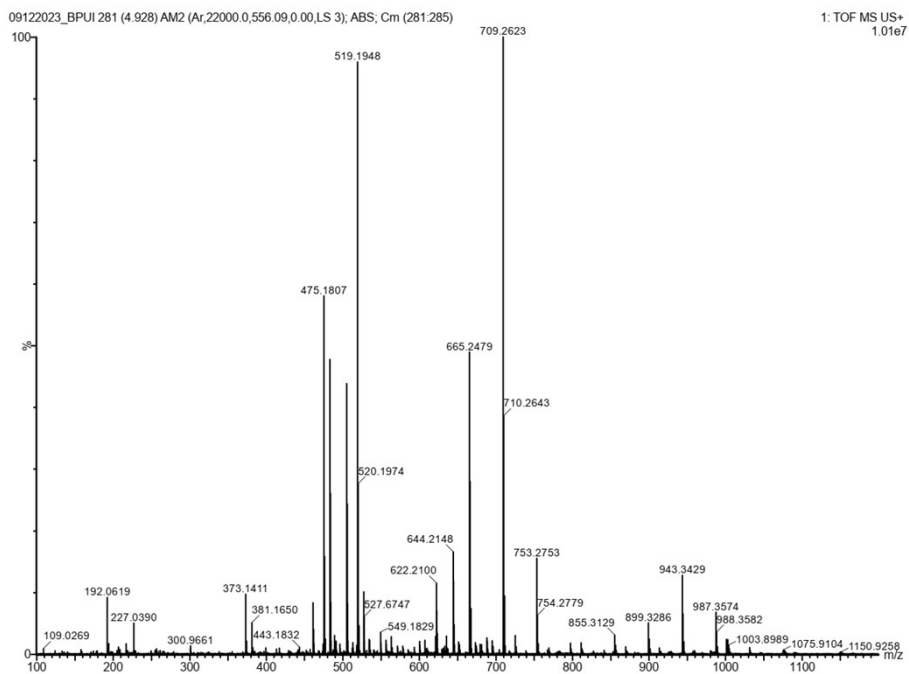

Figure 17S: Mass spectrum of complex C2

## TGA Analysis

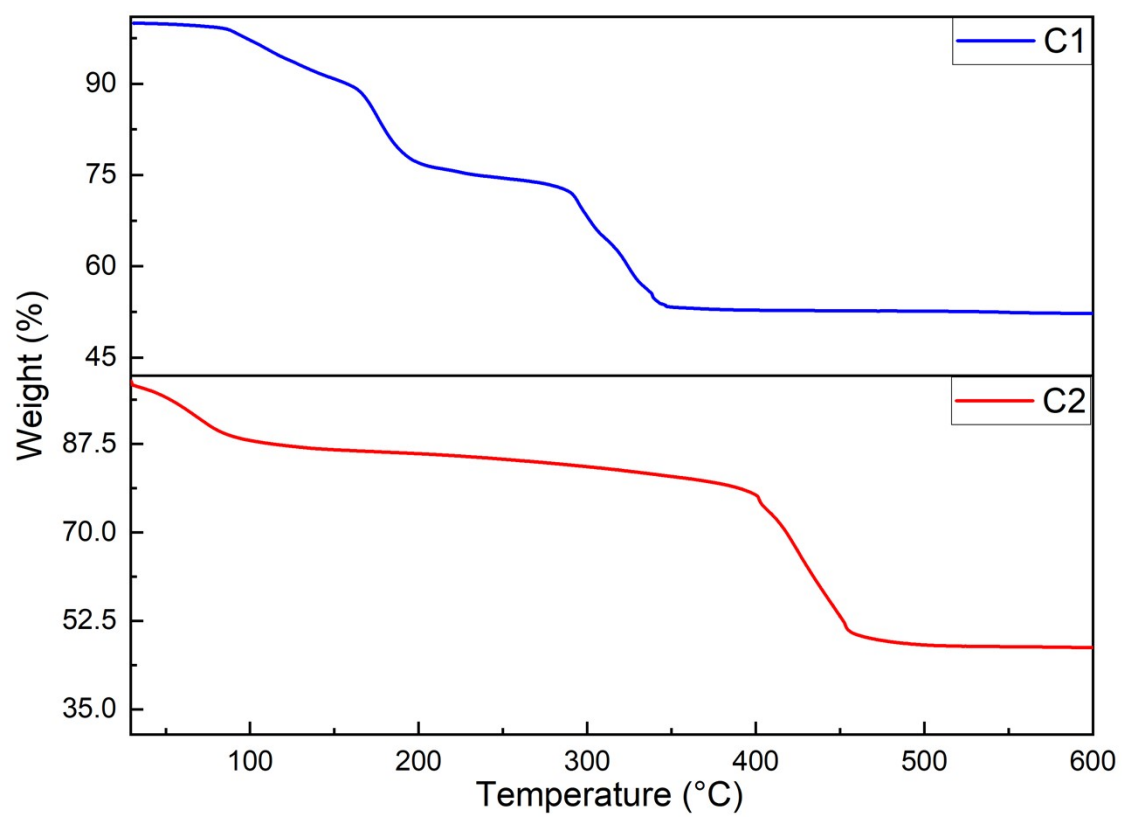

Fig 18S: Thermogravimetric analysis of C1 and C2 complexes.

## Catecholase Activity

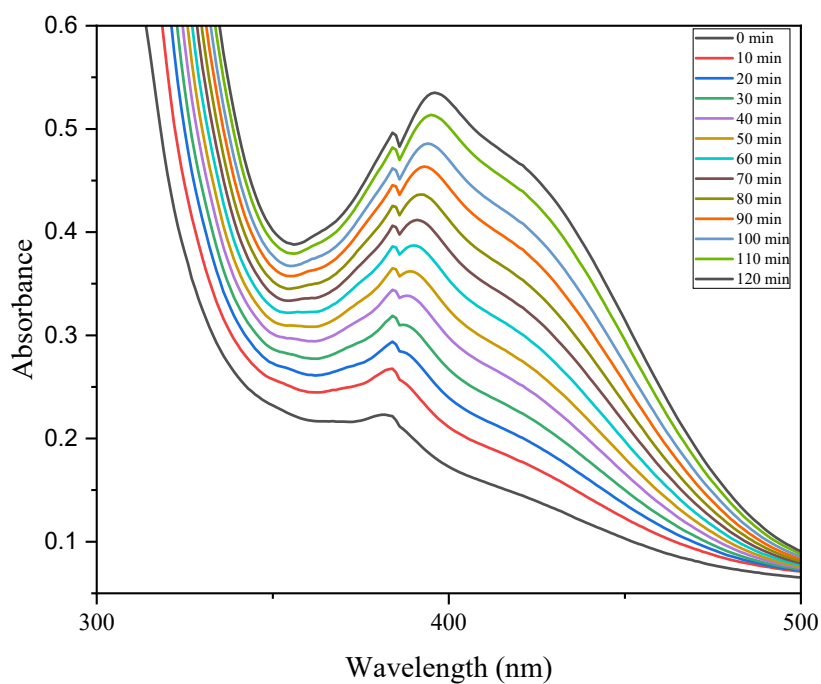

Fig. 19S: Oxidation of DTBC under air using catalyst C1 in methanol at 25°C.

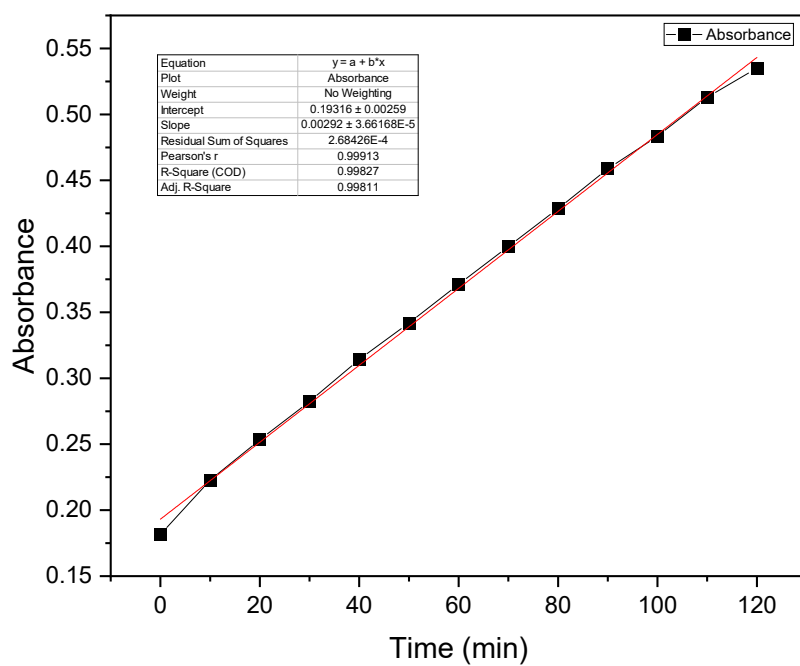

Fig. 20S: Absorbance vs Time graph for catalyst C1 in methanol at 25°C

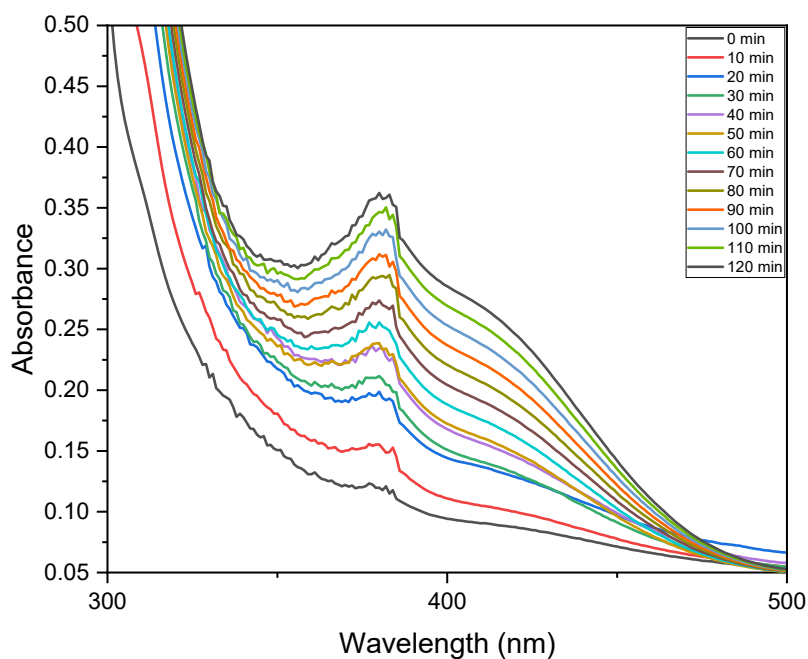

Fig. 21S: Oxidation of DTBC under air using catalyst C1 (50:1) (Substrate: Catalyst) in methanol at 25°C.

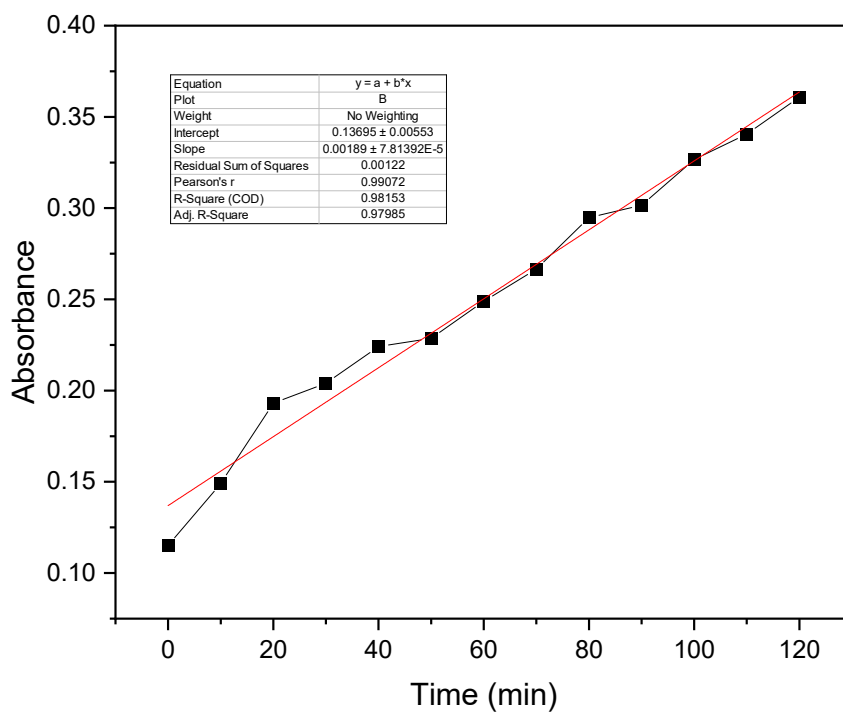

Fig. 22S: Absorbance vs Time graph for catalyst C1 (50:1) (Substrate: Catalyst) in Methanol at 25°C



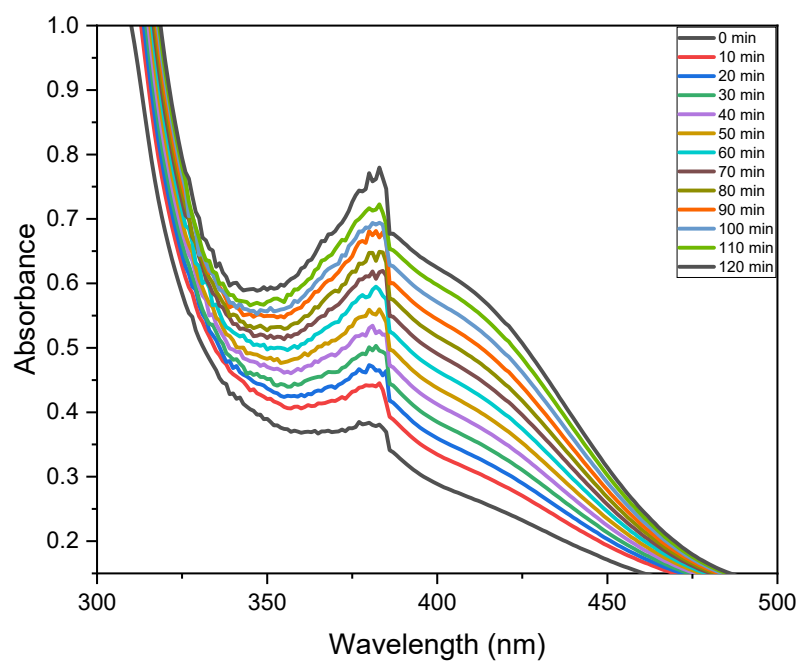

Fig. 23S: Oxidation of DTBC under air using catalyst C1 (100:1) (Substrate: Catalyst) in methanol at 25°C.

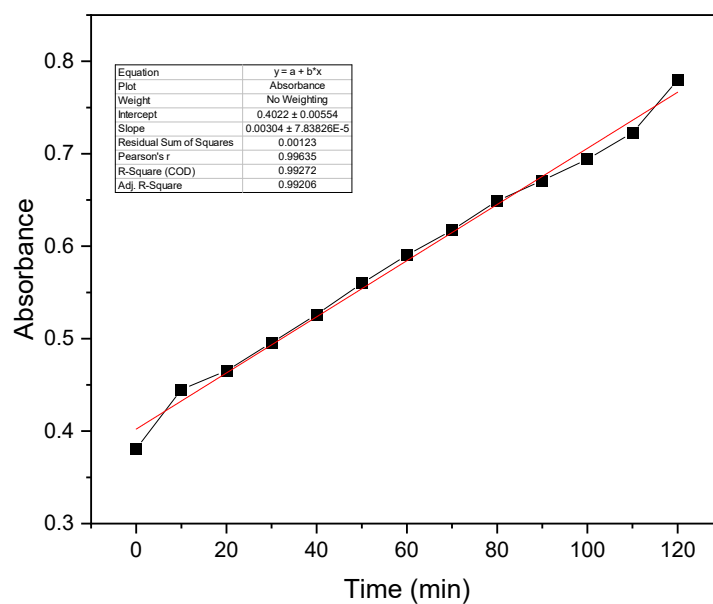

Fig. 24S: Absorbance vs Time graph for catalyst C1 (100:1) (Substrate: Catalyst) in Methanol at 25°C

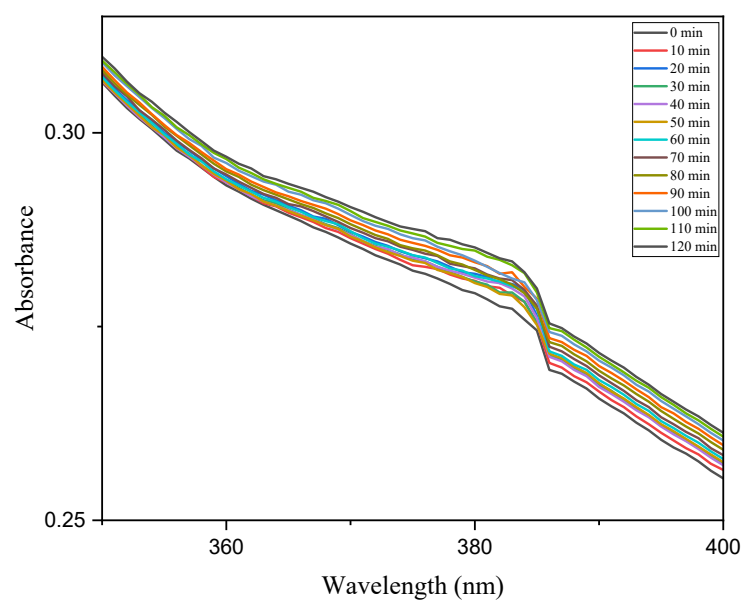

Fig. 25S: Oxidation of DTBC under air using catalyst C1 in DMSO at 25°C.

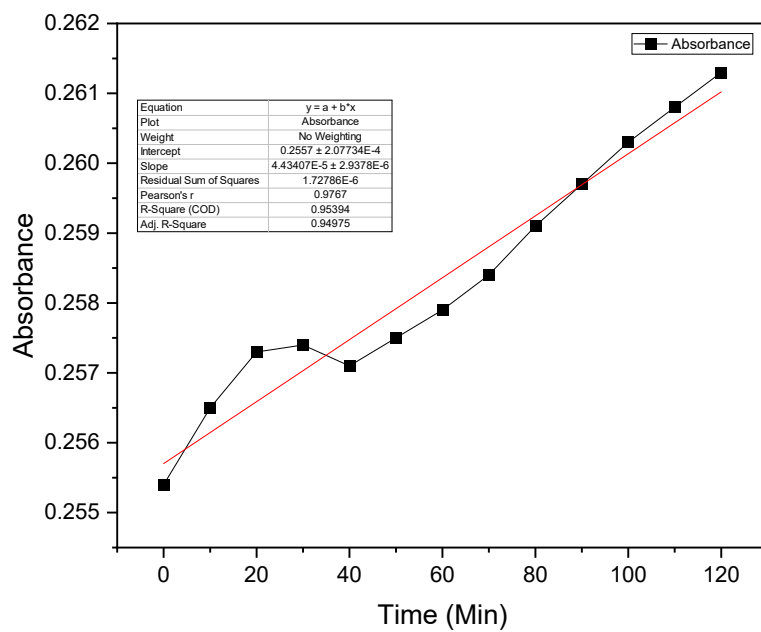

Fig. 26S: Absorbance vs Time graph for catalyst C1 in DMSO at 25°C

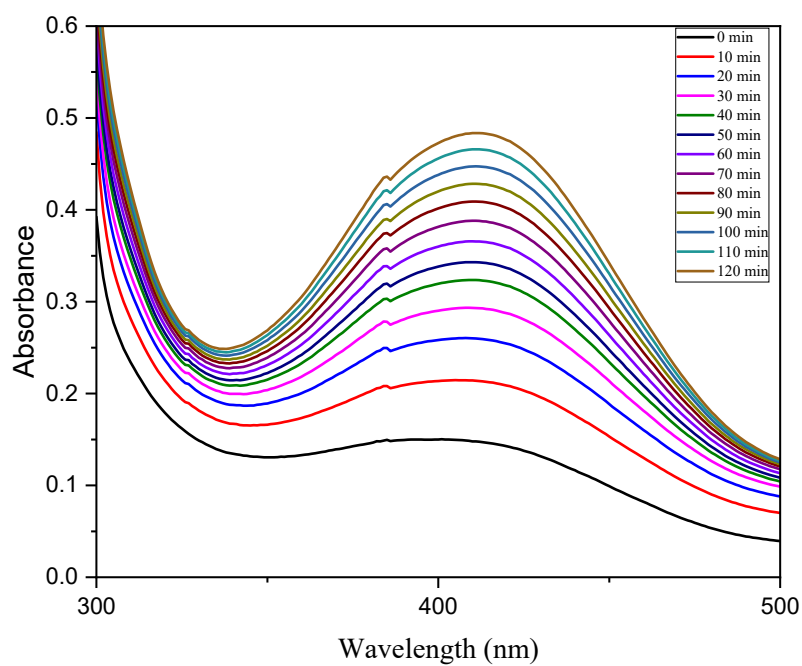

Fig. 27S: Oxidation of DTBC under air using catalyst C1 in methanol: water (1:1) at 25°C.

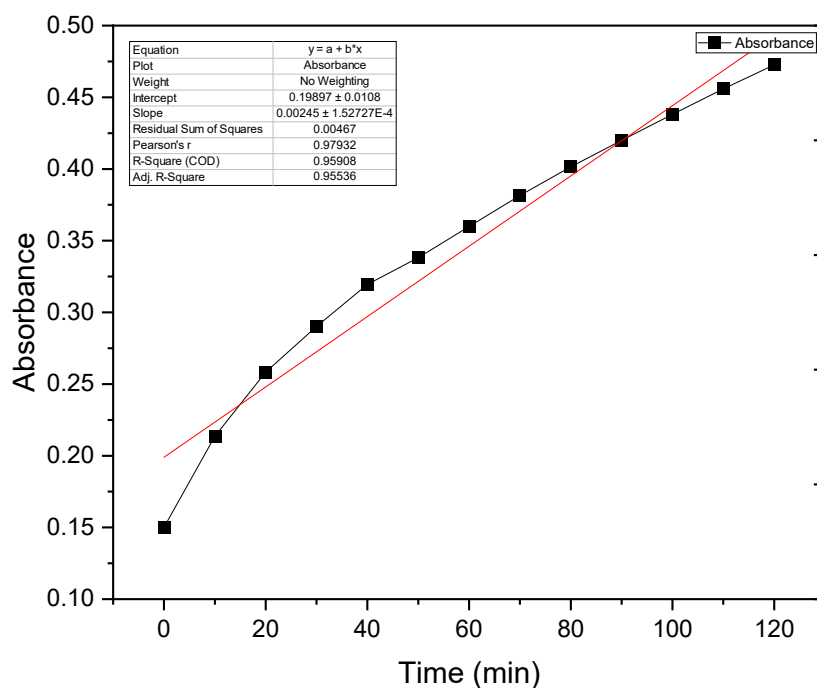

Fig. 28S: Absorbance v/s Time graph for catalyst C1 in methanol:water (1:1) at 25°C.

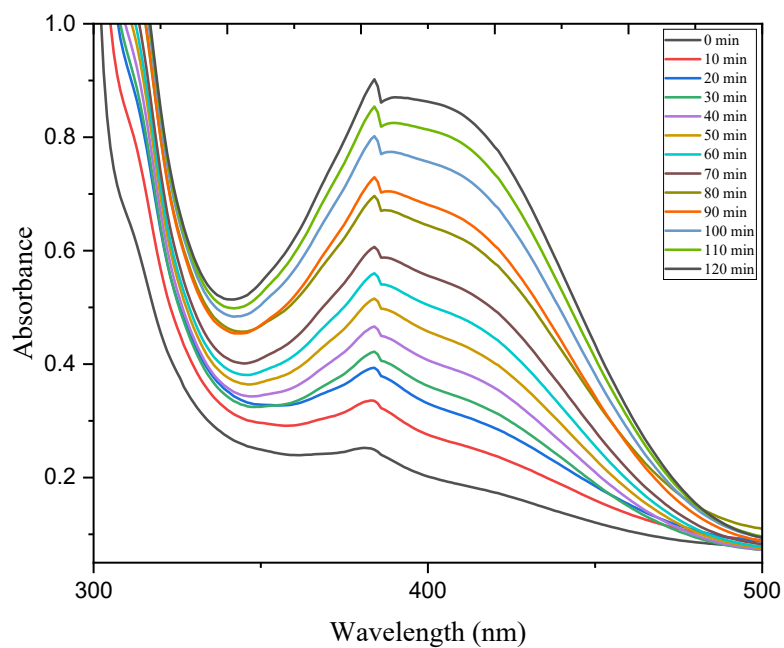

Fig. 29S: Oxidation of DTBC under air using catalyst C1 in methanol at 50°C.

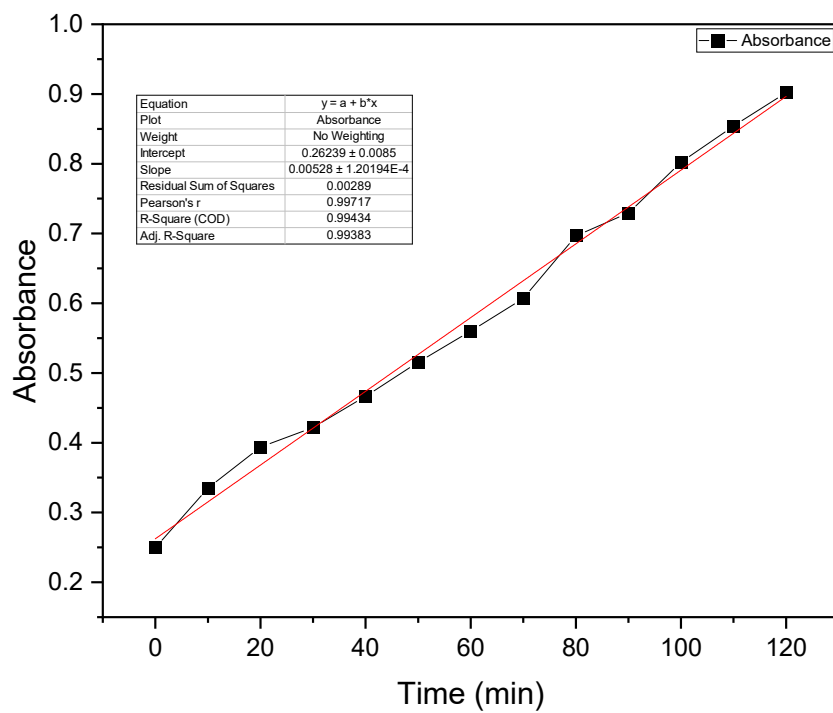

Fig. 30S: Absorbance v/s Time graph for catalyst C1 in methanol at 50°C.

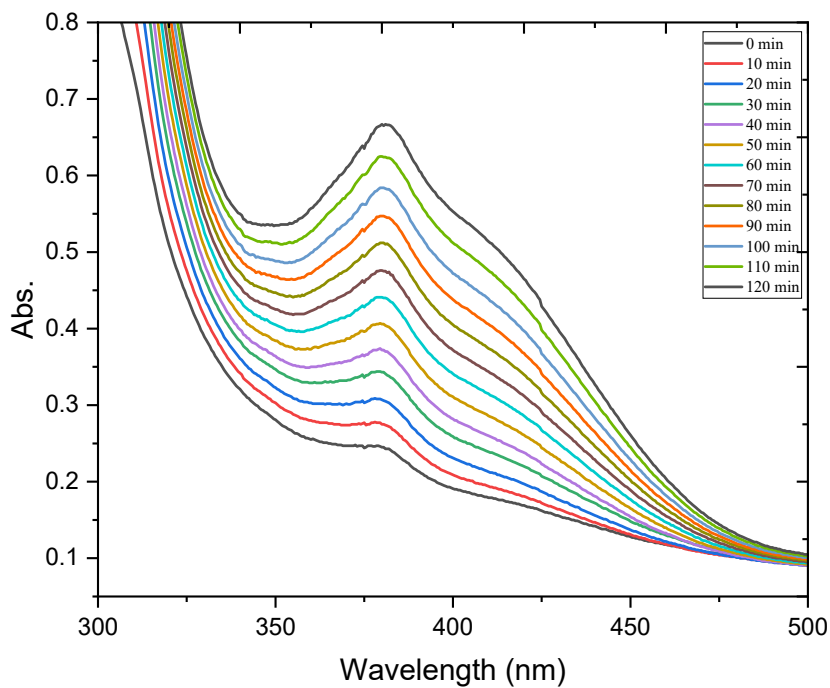

Fig. 31S: Oxidation of DTBC under air using catalyst C1 in methanol at 25°C under higher O<sub>2</sub> concentration.

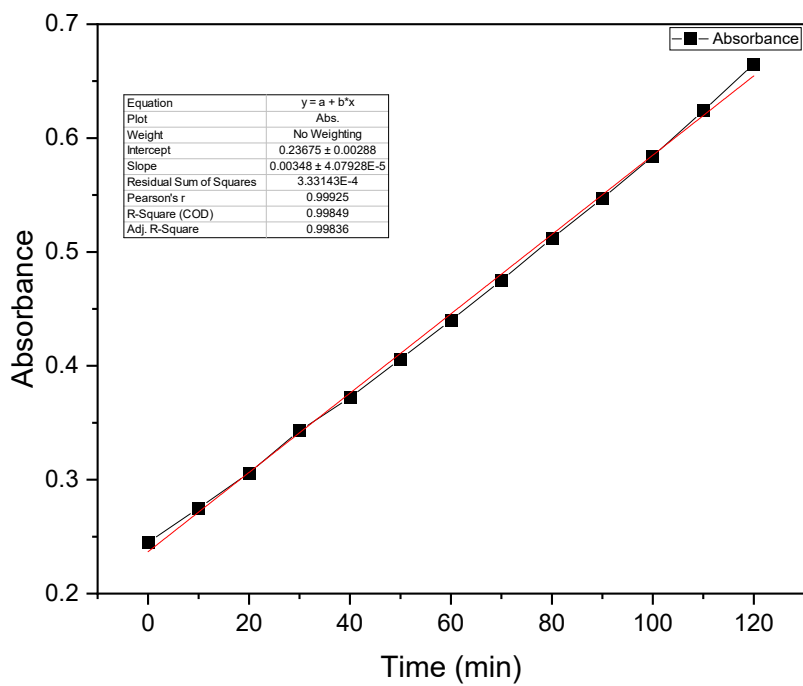

Fig. 32S: Absorbance v/s time graph catalyst C1 in methanol at 25°C under higher O<sub>2</sub> concentration.

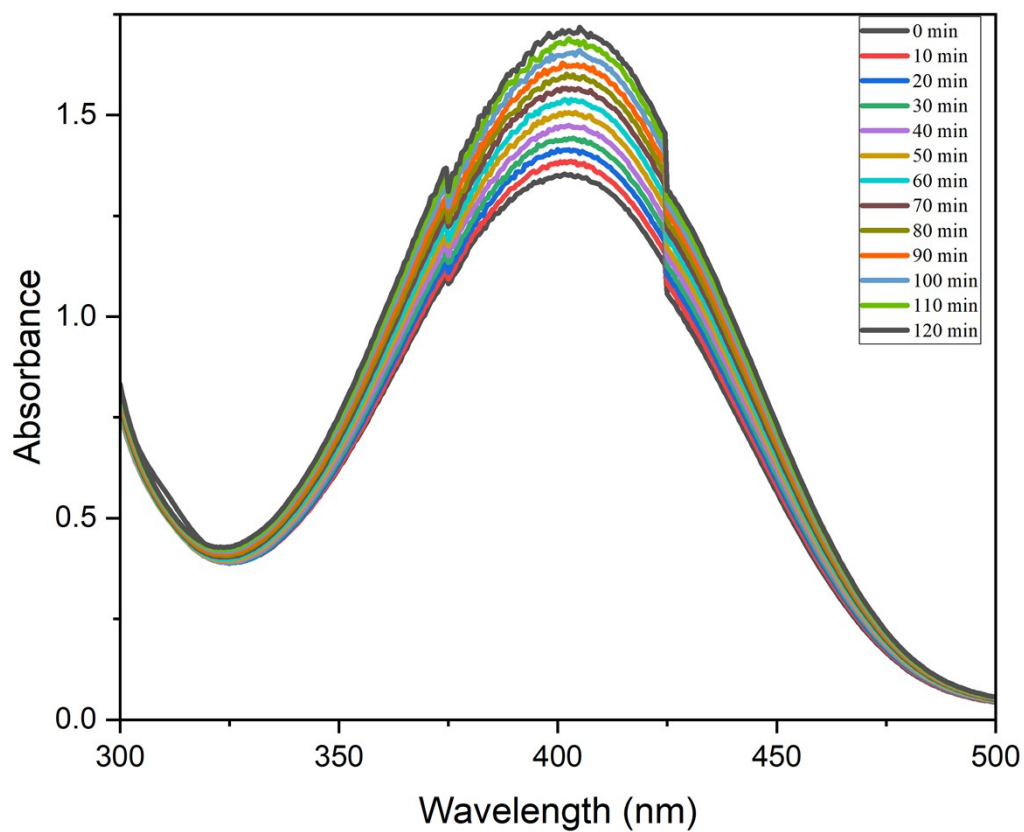

Fig. 33S: Oxidation of DTBC under air using catalyst C1 in methanol at 25°C at pH 10.

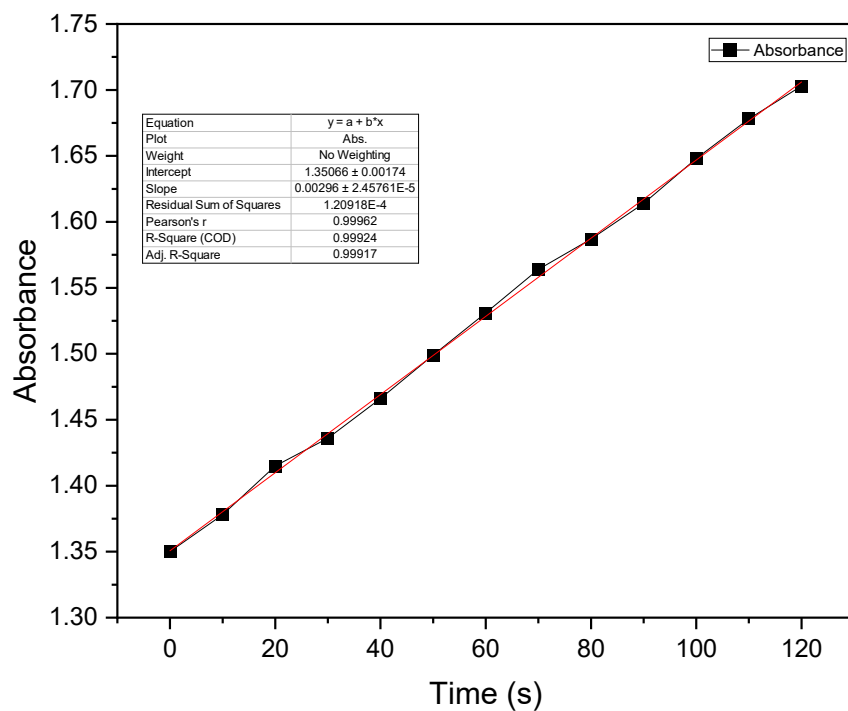

Fig. 34S: Absorbance v/s Time graph for catalyst C1 in methanol at 25°C at pH 10.

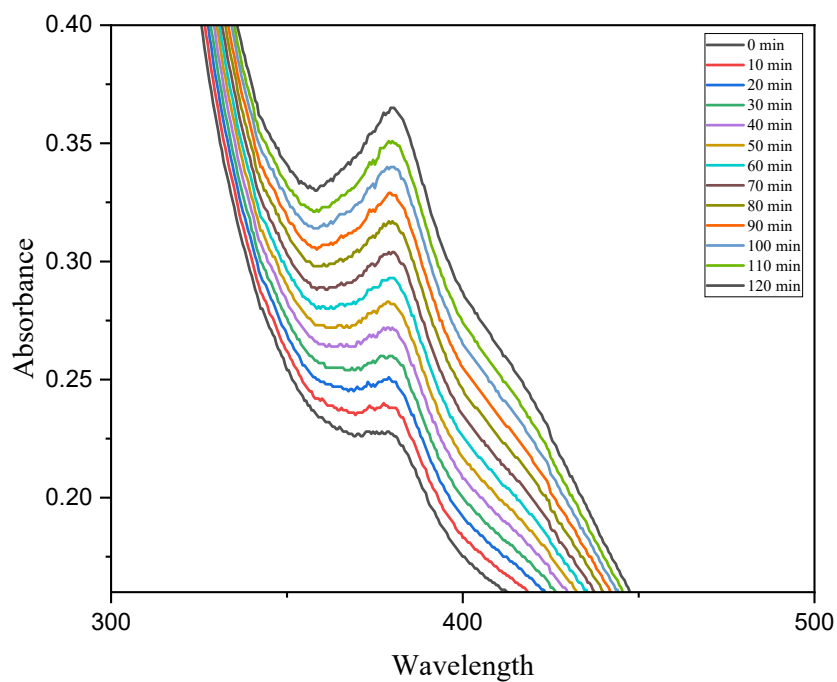

Fig. 35S: Oxidation of DTBC under air using catalyst C1 in methanol at 25°C at pH 3.

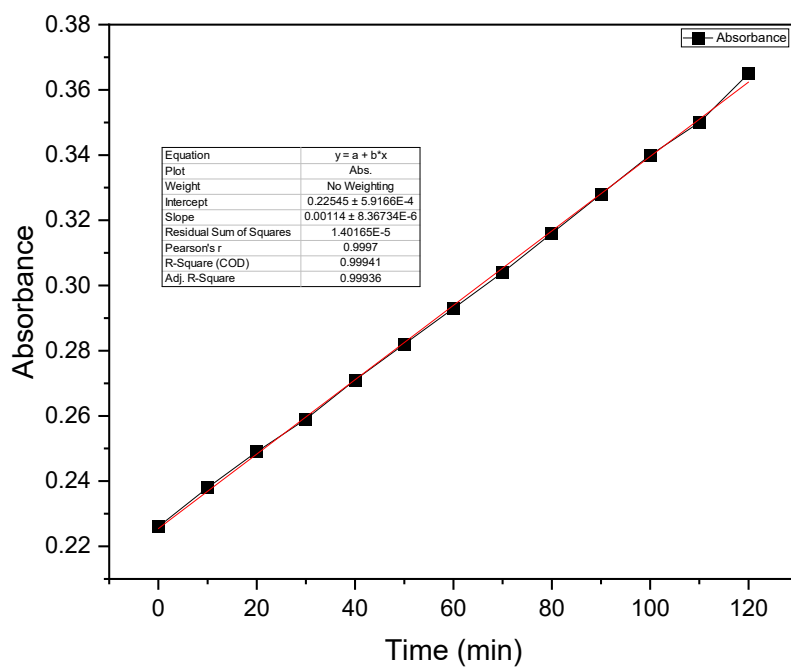

Fig. 36S: Absorbance v/s Time graph for catalyst C1 in methanol at 25°C at P<sup>H</sup> 3.



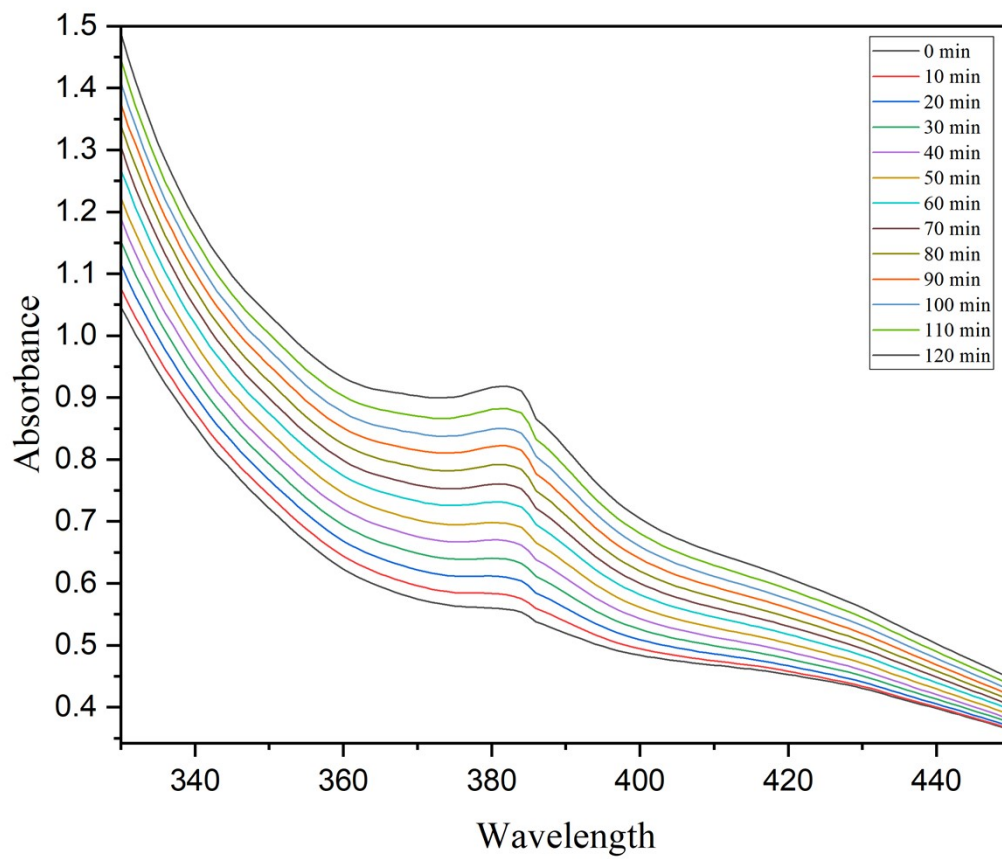

Fig. 37S: Oxidation of DTBC under air using catalyst C2 in methanol at 25°C.

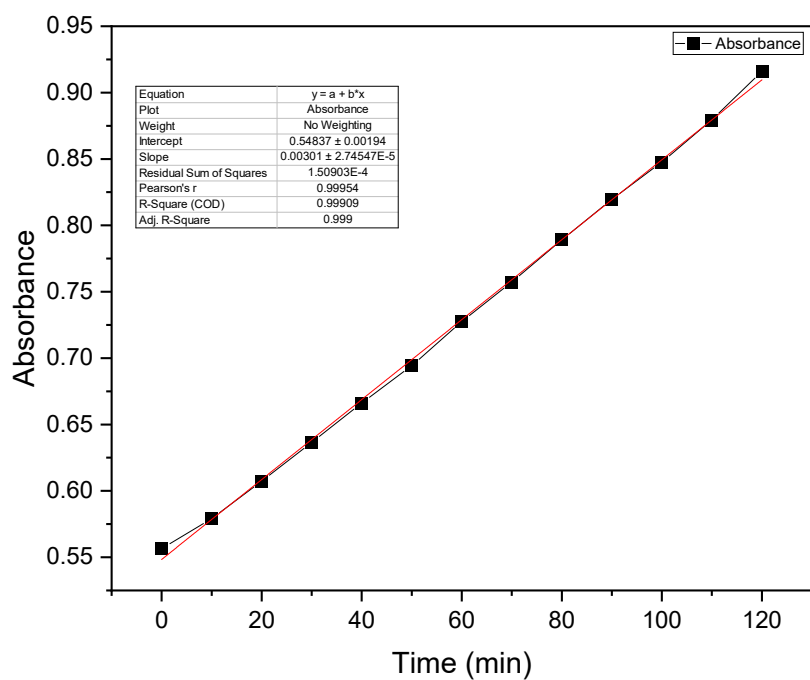

Fig. 38S: Absorbance v/s Time graph for catalyst C2 in methanol at 25°C

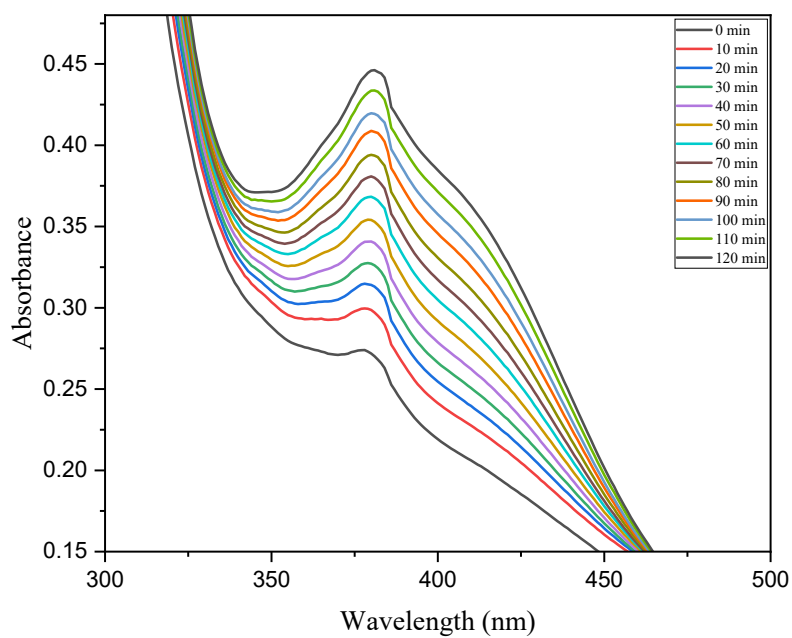

Fig. 39S: Oxidation of DTBC under air using uranyl acetate in methanol at 25°C.

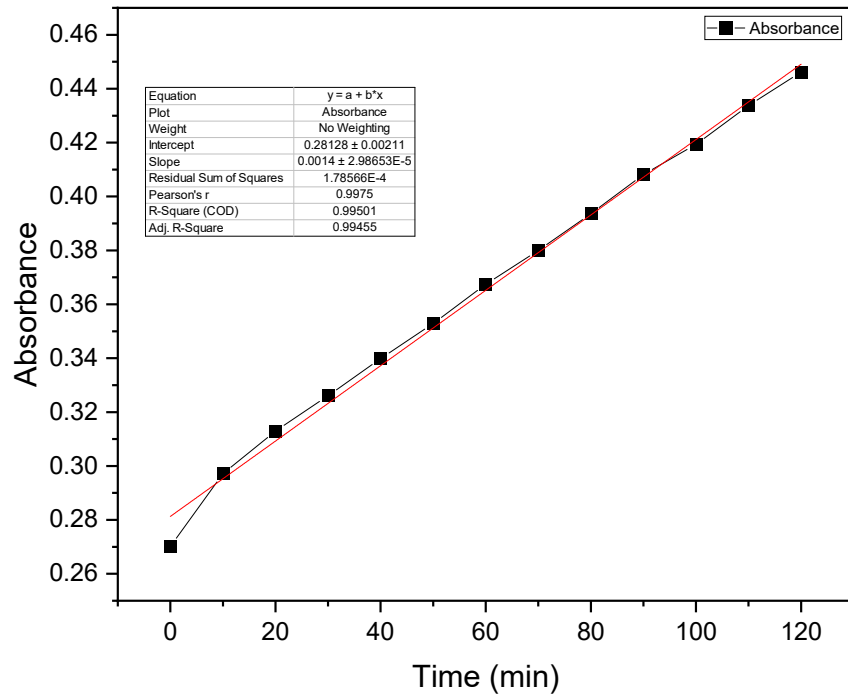

Fig. 40S: Absorbance v/s Time graph for uranyl acetate in methanol at 25°C.

## Phenoxazinone Synthase Activity.

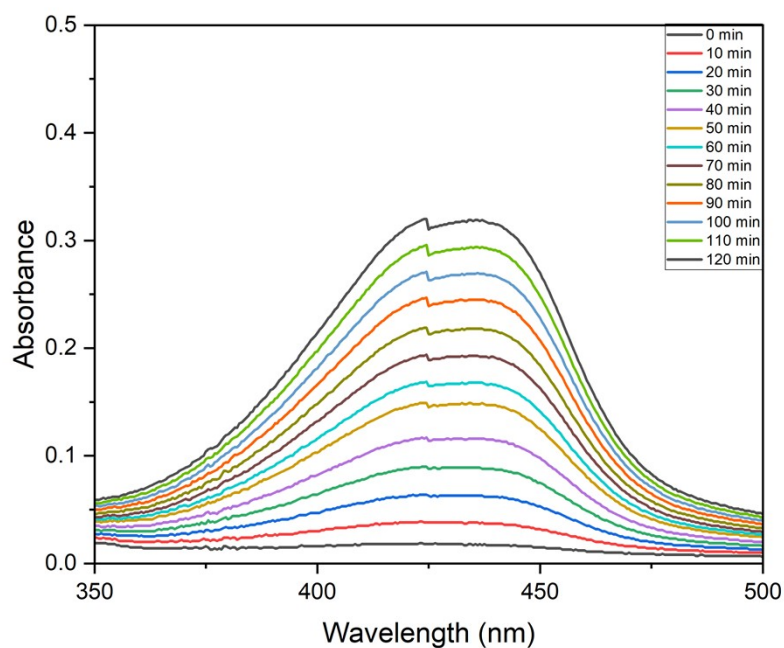

Fig. 41S: Oxidation of 2-aminophenol using catalyst C1, in a catalyst to substrate ratio of 1:50.

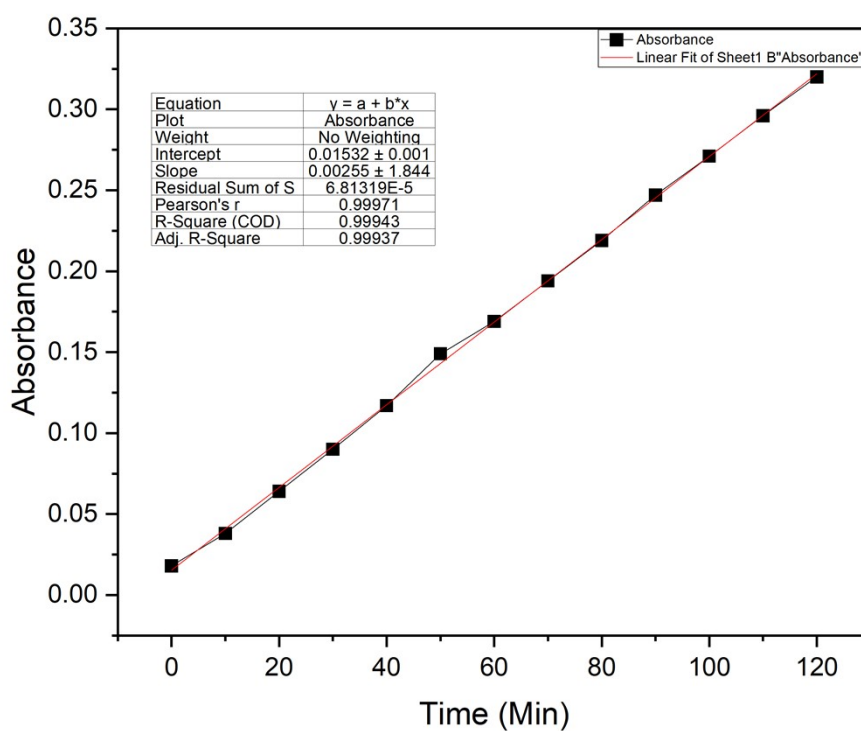

Fig. 42S: Absorbance vs Time graph for catalyst C1, in a catalyst to substrate ratio of 1:50.

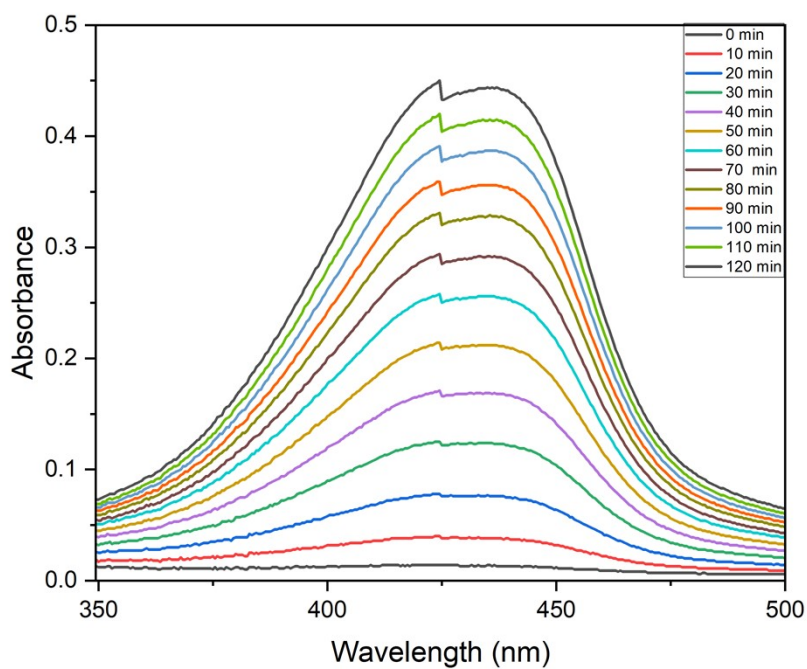

Fig. 43S: Oxidation of 2-aminophenol using catalyst C2, in a catalyst to substrate ratio of 1:50.

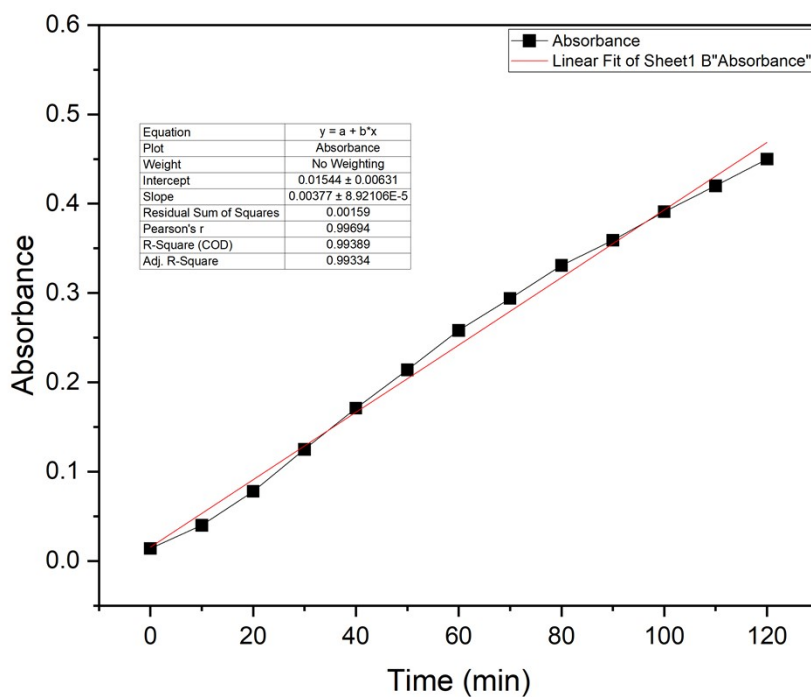

Fig. 44S: Absorbance vs Time graph for catalyst C2, in a catalyst to substrate ratio of 1:50.

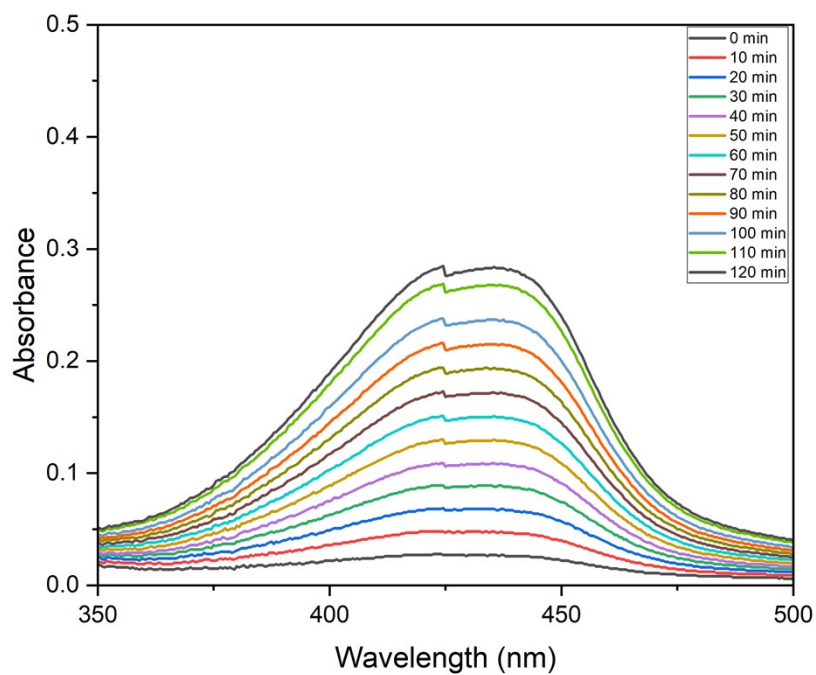

Fig. 45S: Oxidation of 2-aminophenol using uranyl acetate, in a catalyst to substrate ratio of 1:50.

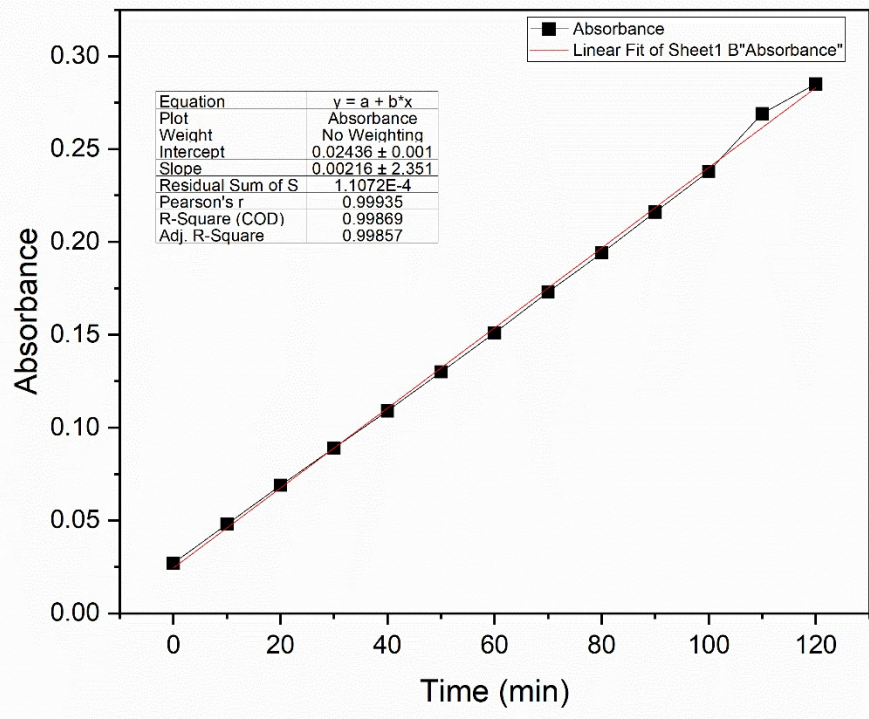

Fig. 46S: Absorbance vs Time graph for uranyl acetate, in a catalyst to substrate ratio of 1:50.

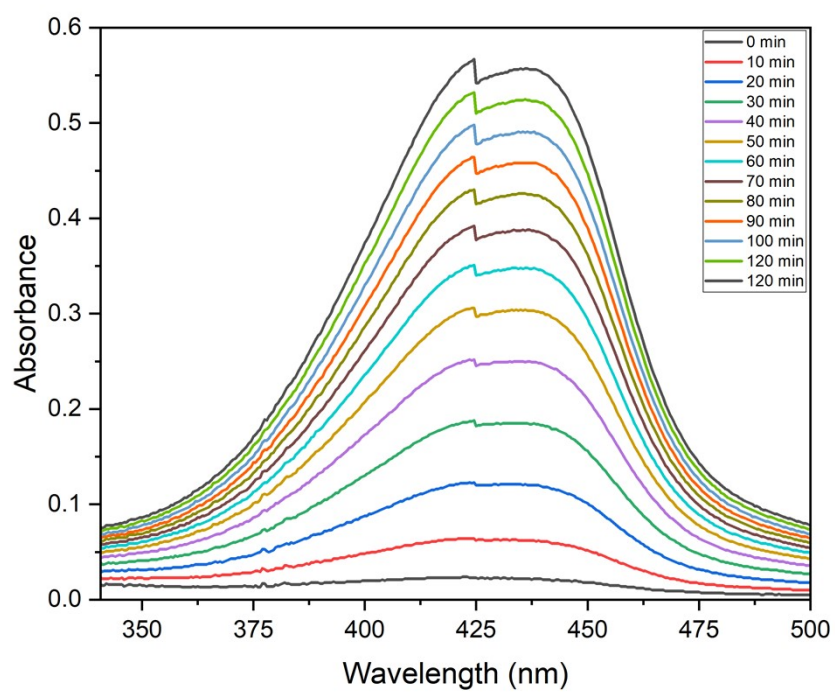

Fig.47S: Oxidation of 2-aminophenol using C2, in a catalyst to substrate ratio of 1:100.



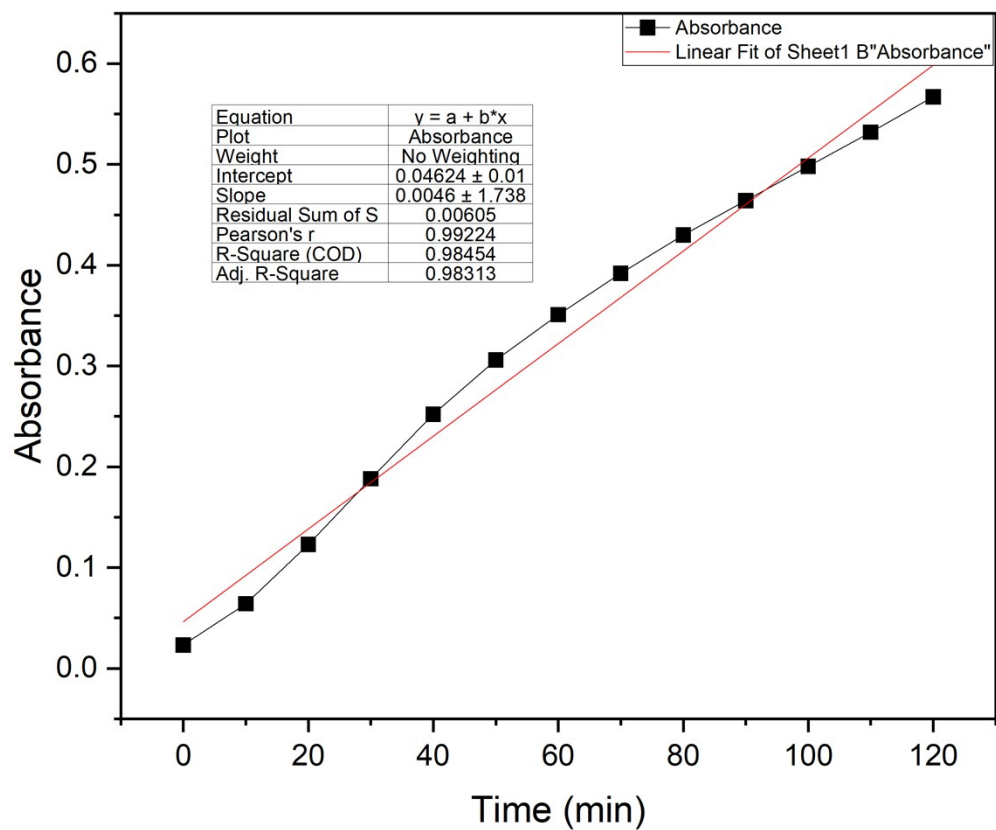

Fig. 48S: Absorbance vs Time graph for catalyst C2, in a catalyst to substrate ratio of 1:100.

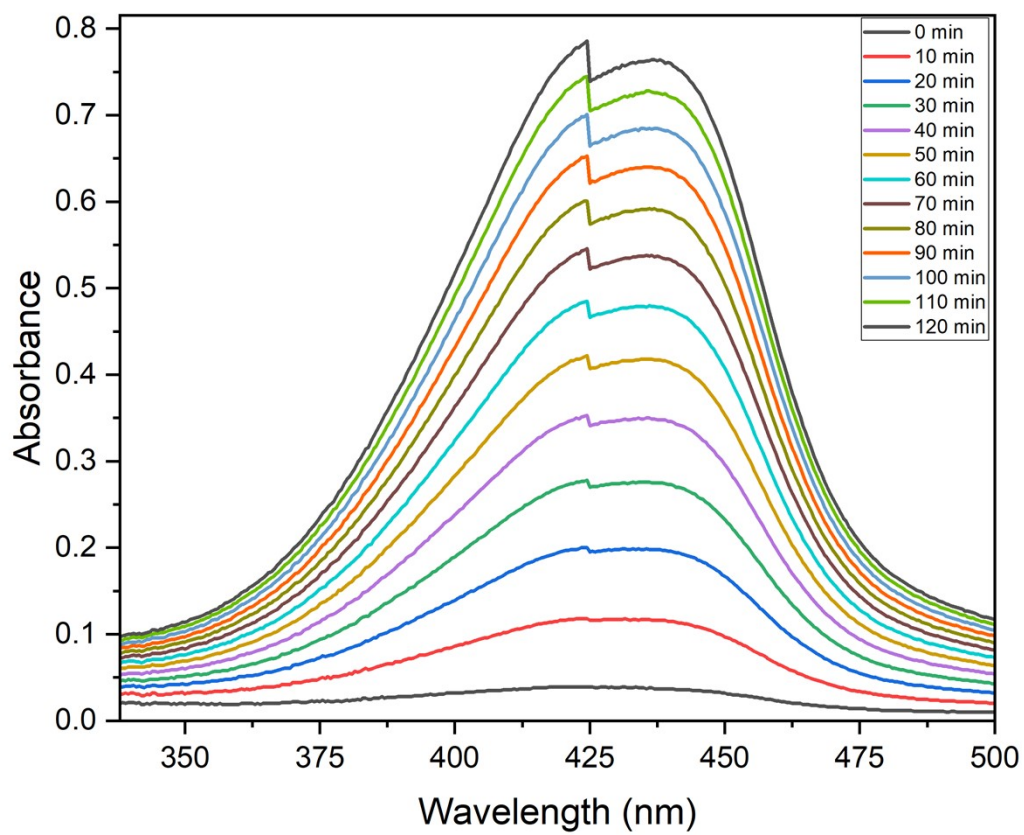

Fig. 49S: Oxidation of 2-aminophenol using C2, in a catalyst to substrate ratio of 1:200.

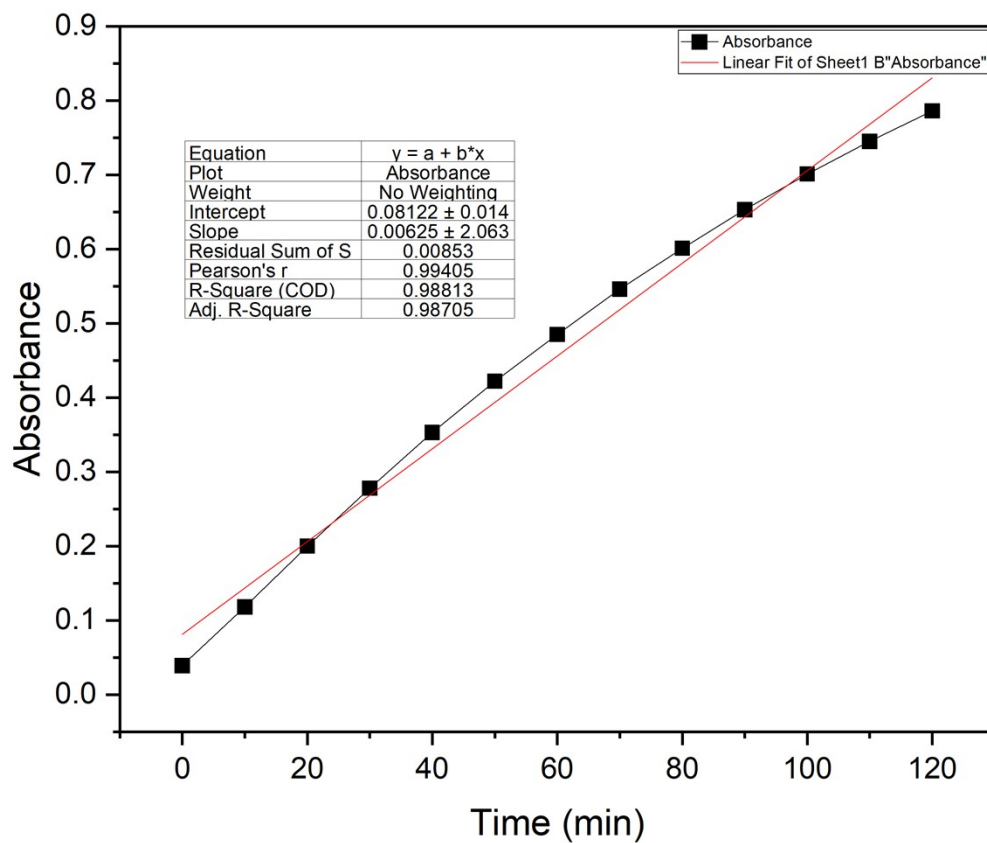

Fig.50S: Absorbance vs Time graph for catalyst C2, in a catalyst to substrate ratio of 1:200.

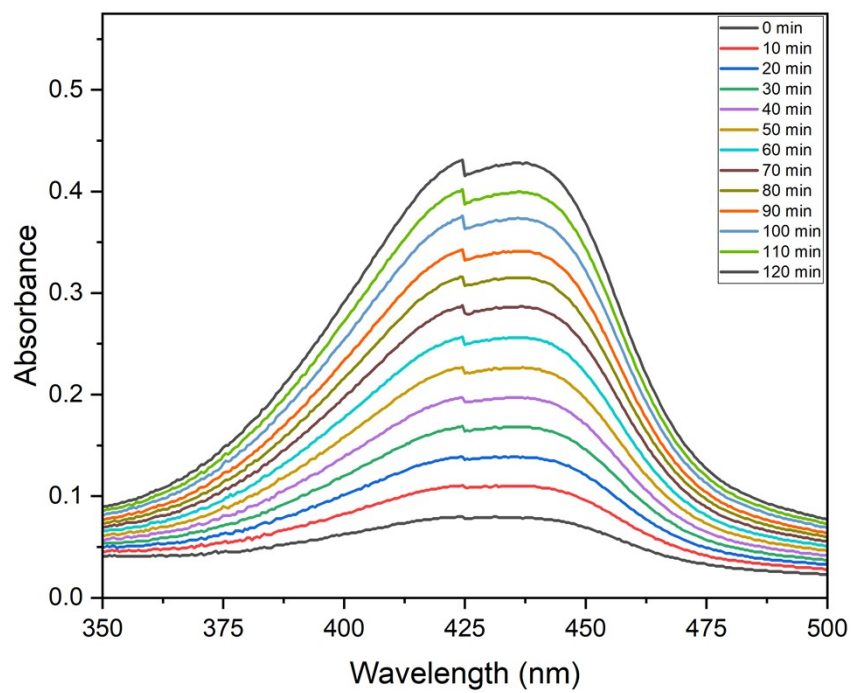

Fig. 51S: Oxidation of 2-aminophenol using C2, in a catalyst to substrate ratio of 1:500.

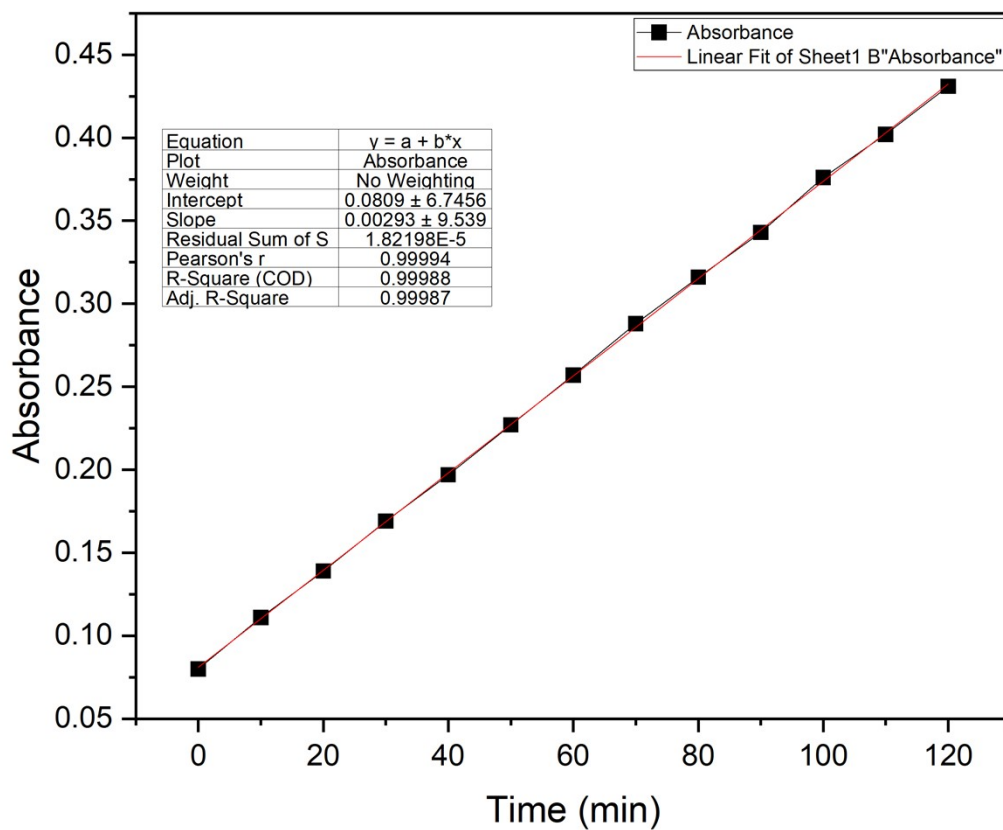

Fig. 52S: Absorbance vs Time graph for catalyst C2, in a catalyst to substrate ratio of 1:500.

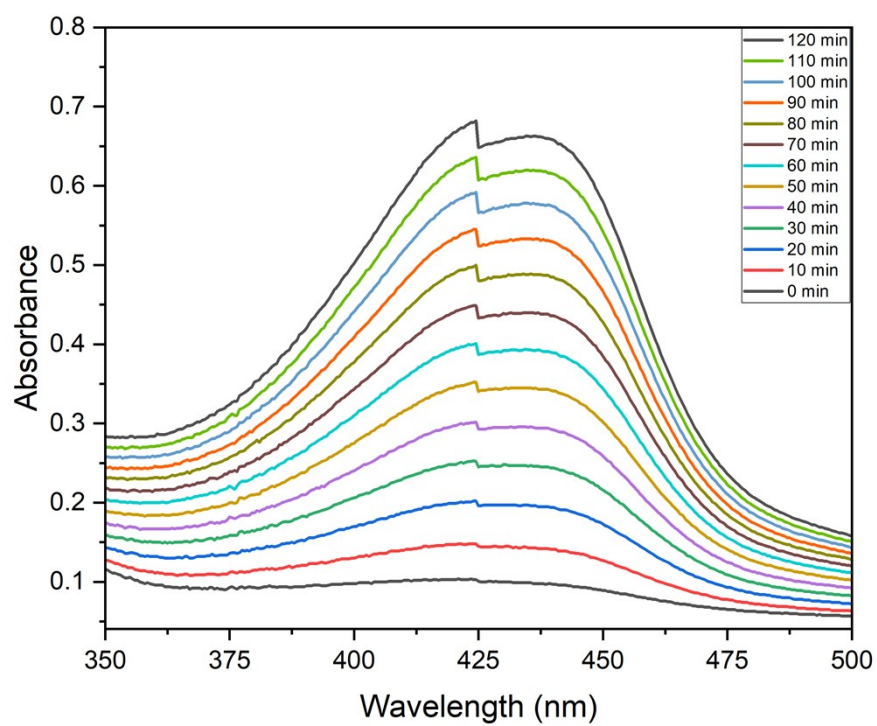

Fig. 53S: Oxidation of 2-aminophenol using C2 in basic pH-10, in a catalyst to substrate ratio of 1:100.

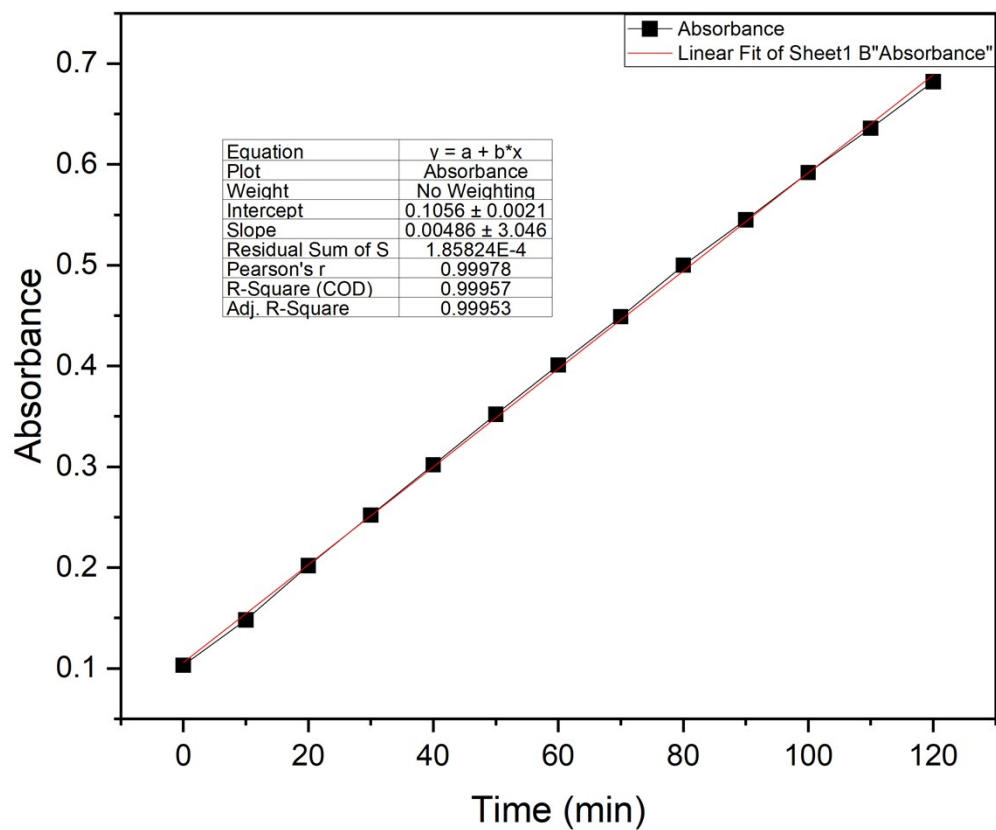

Fig. 54S: Absorbance vs Time graph for C2 in basic pH-10, in a catalyst to substrate ratio of 1:100.

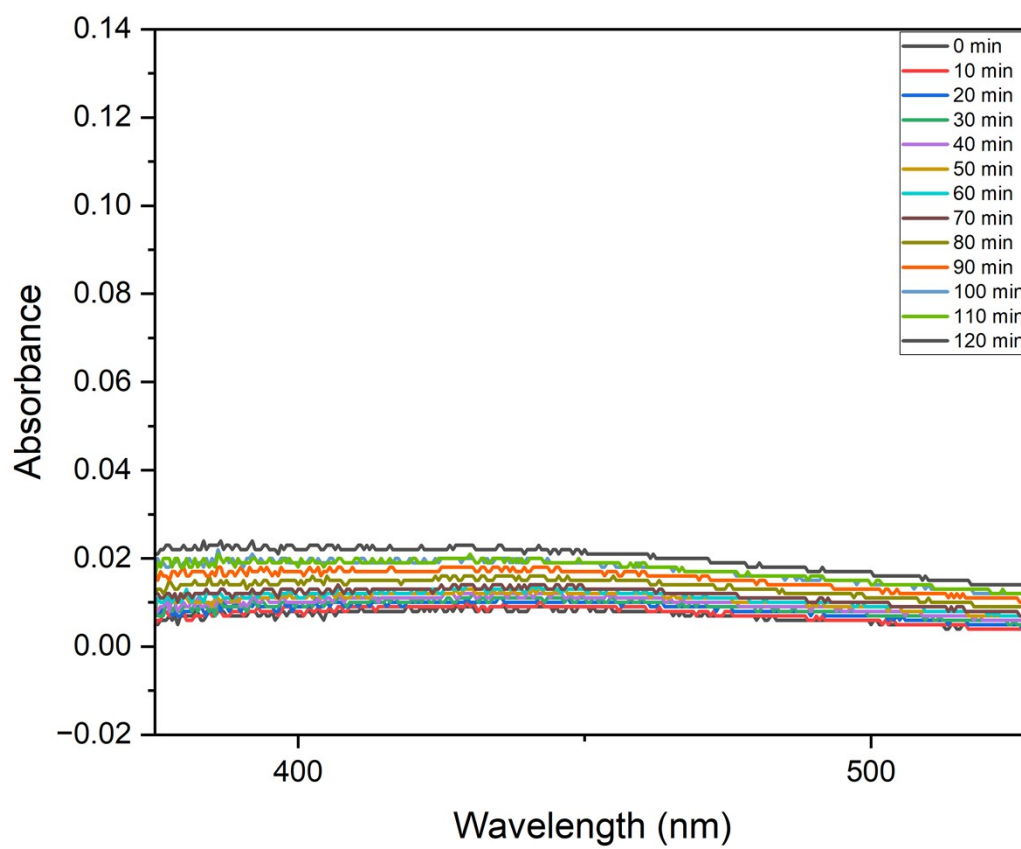

Fig. 55S: Oxidation of 2-aminophenol using C2 in acidic pH-3, in a catalyst to substrate ratio of 1:100.



## BSA interaction studies using UV-Visible Spectroscopy and Photoluminescence Spectroscopy.

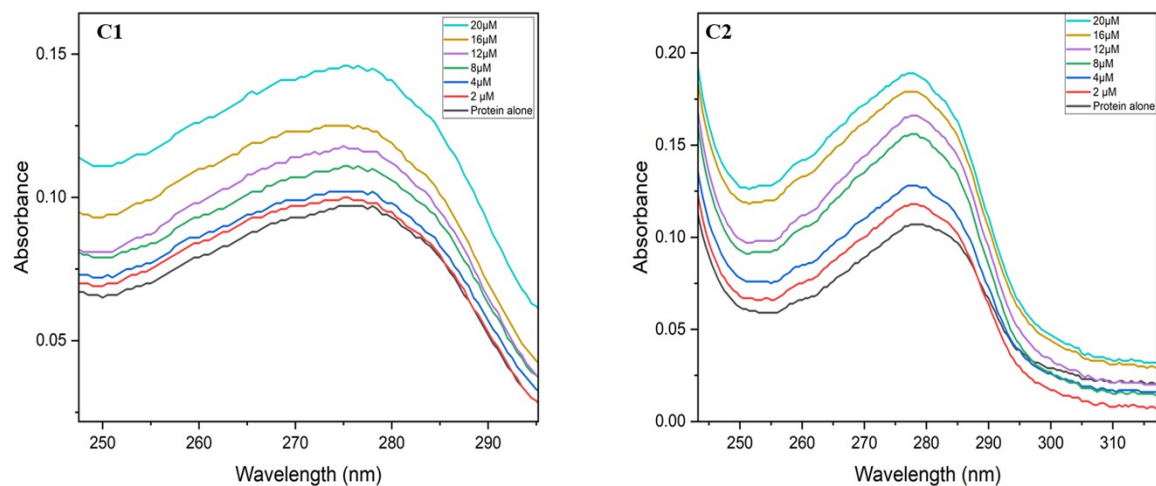

Fig. 56S: BSA protein interaction studies of complex C1 and C2 using UV-Vis Spectroscopy.

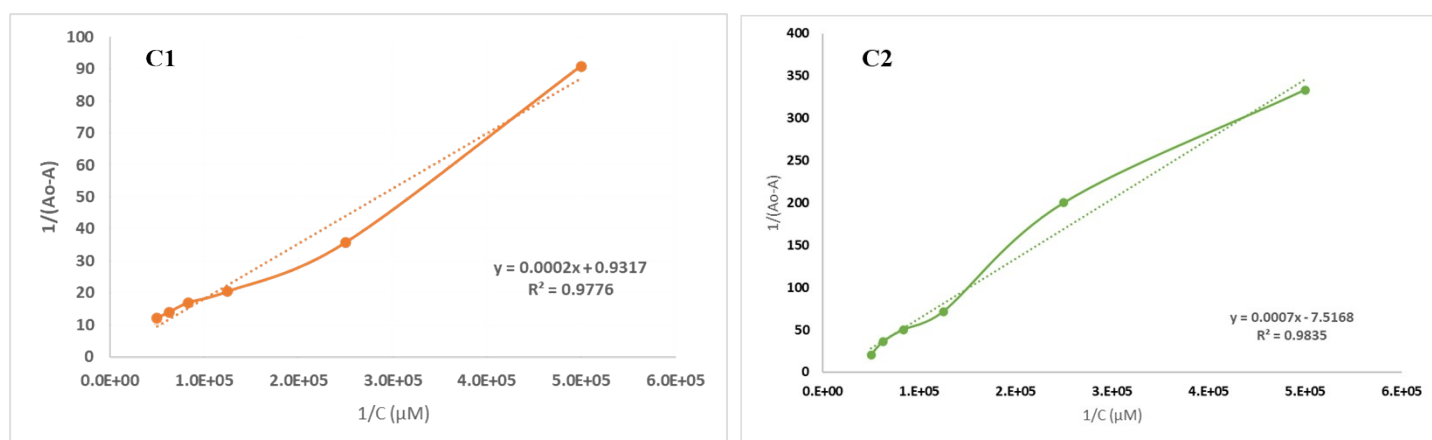

Fig. 57S: BSA protein interaction studies of complex C1 and C2 and binding constant (K) calculations.

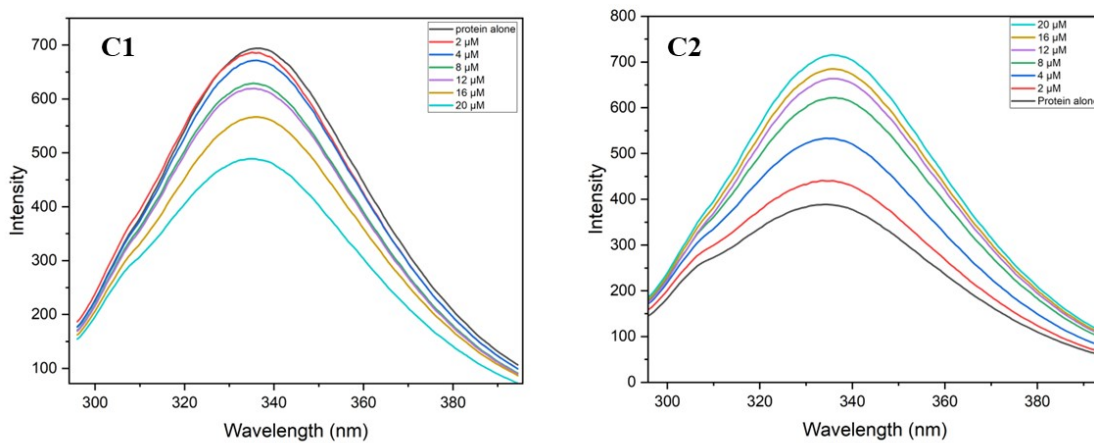

Fig.58S: BSA protein interaction studies of complex C1 and C2 using UV-Vis Spectroscopy.

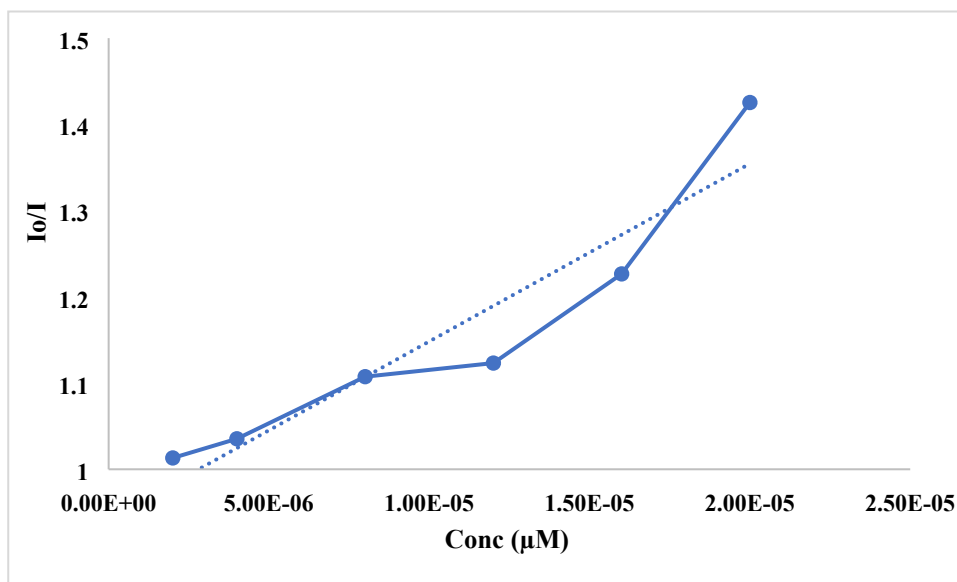

Fig.59S: Stern-Volmer plot for BSA protein interaction studies of complex C1.

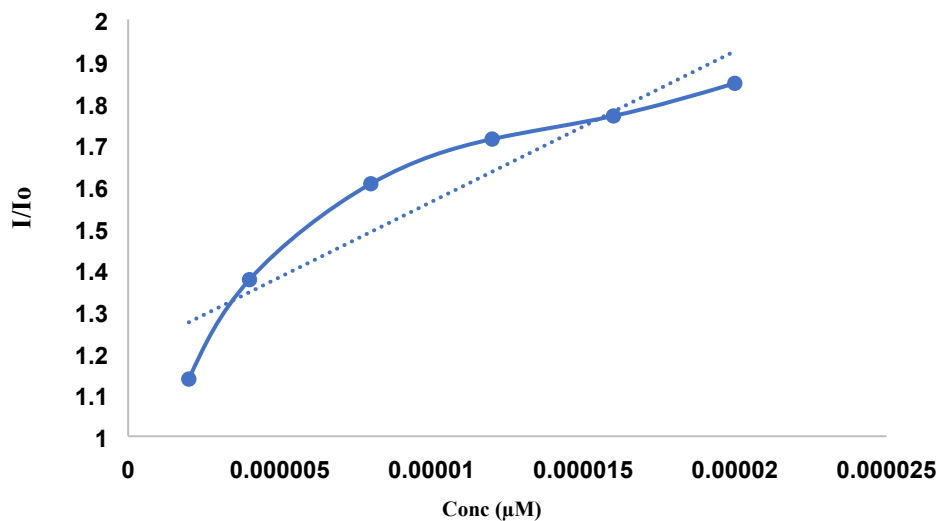

Fig. 60S: Modified Stern-Volmer plot for BSA protein interaction studies of complex C2.

## Cytotoxicity studies

### MTT Lung Cancer

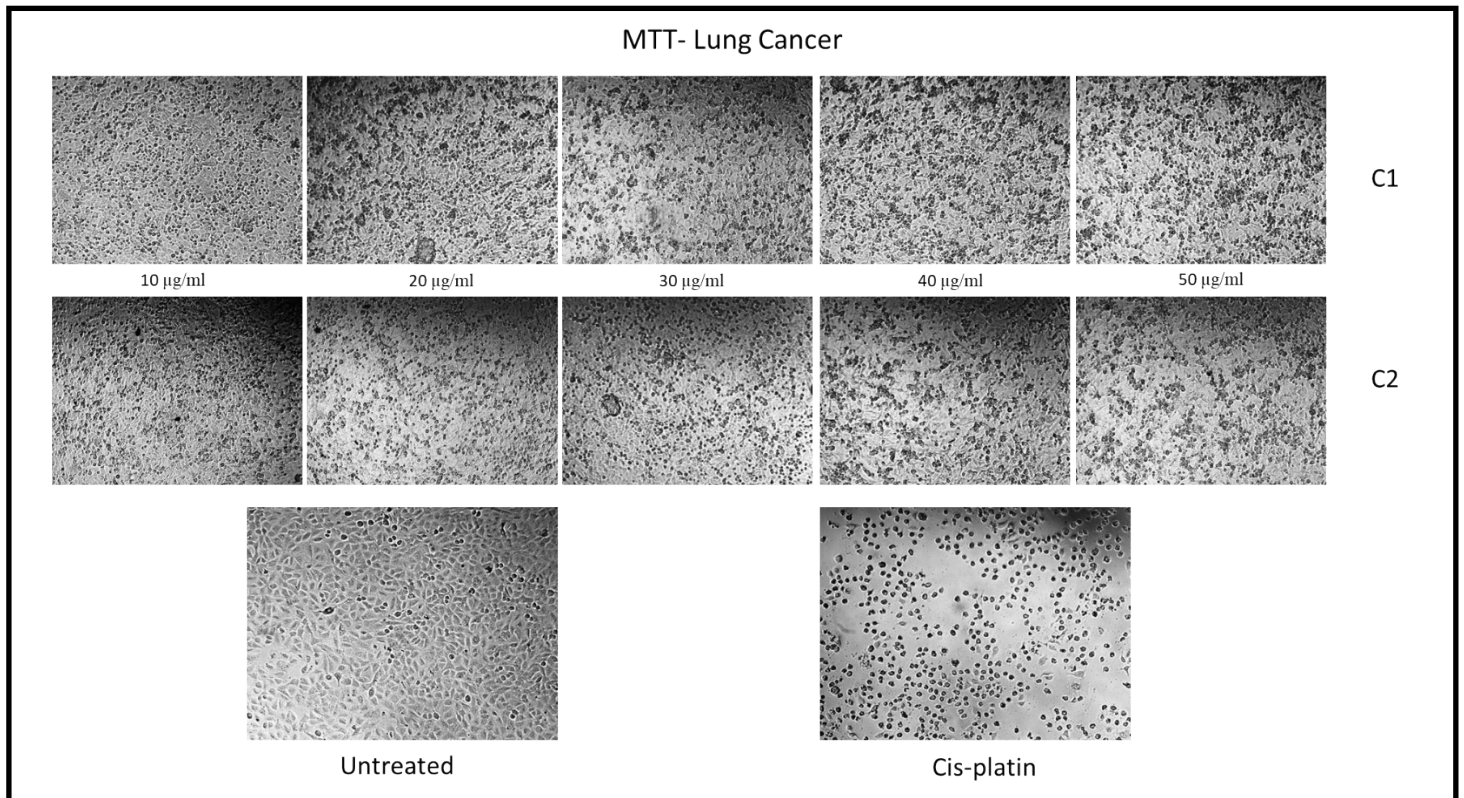

Fig. 61S: Cytotoxicity studies of the complexes against complexes C1 and C2 against MTT-Lung Cancer Cell line.

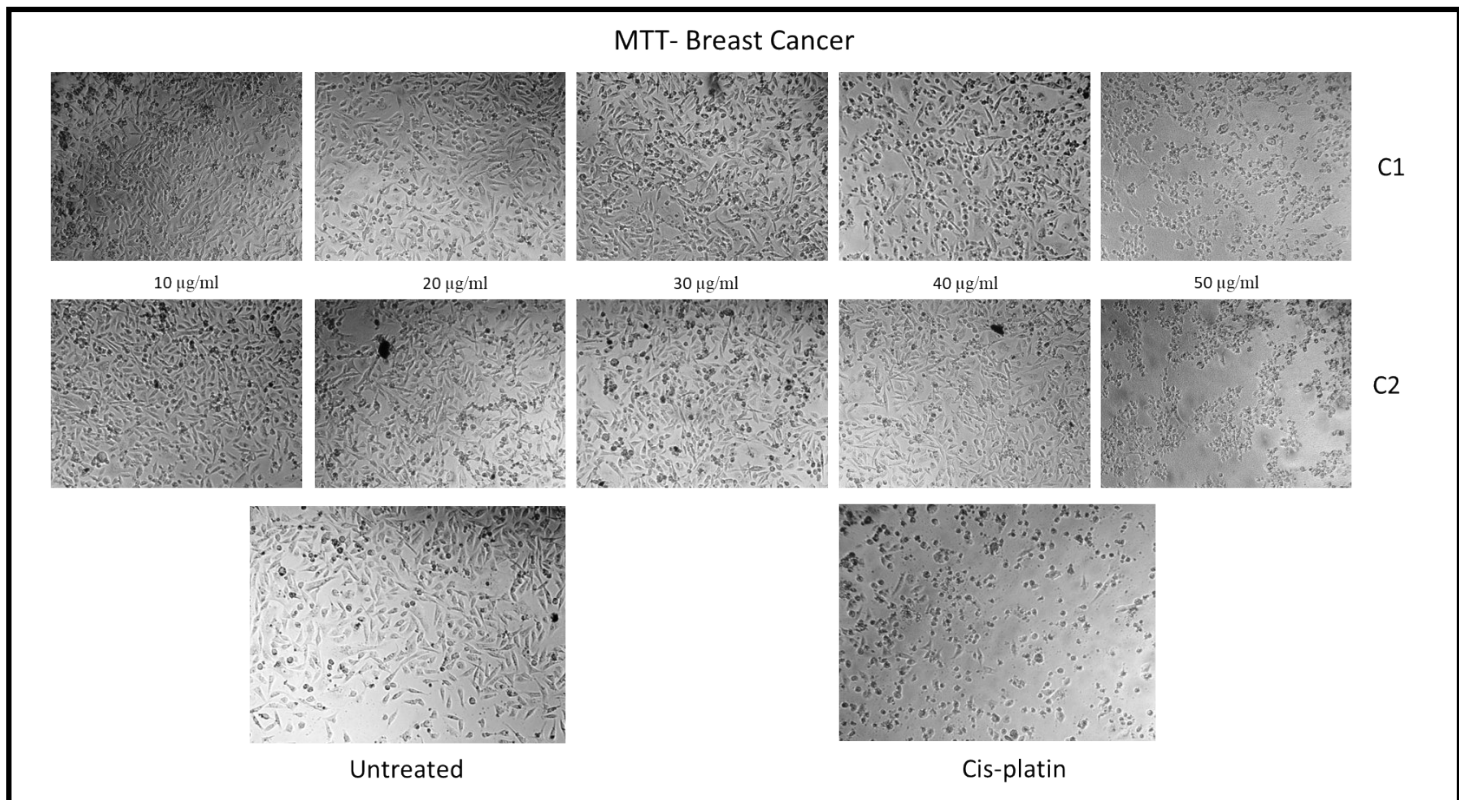

Fig.62S: Cytotoxicity studies of the complexes against complexes C1 and C2 against MTT- Breast Cancer Cell line.

## Crystal Structure Data for C1

**Table 1S Crystal data and structure refinement for C1.**

|                                             |                                                                                |
|---------------------------------------------|--------------------------------------------------------------------------------|
| Identification code                         | C1                                                                             |
| Empirical formula                           | C <sub>32</sub> H <sub>48</sub> N <sub>16</sub> O <sub>20</sub> U <sub>4</sub> |
| Formula weight                              | 1928.98                                                                        |
| Temperature/K                               | 300(2)                                                                         |
| Crystal system                              | monoclinic                                                                     |
| Space group                                 | P2 <sub>1</sub> /c                                                             |
| a/Å                                         | 12.2065(13)                                                                    |
| b/Å                                         | 15.7058(16)                                                                    |
| c/Å                                         | 14.4096(15)                                                                    |
| α/°                                         | 90                                                                             |
| β/°                                         | 104.927(4)                                                                     |
| γ/°                                         | 90                                                                             |
| Volume/Å <sup>3</sup>                       | 2669.3(5)                                                                      |
| Z                                           | 2                                                                              |
| ρ <sub>calc</sub> /g/cm <sup>3</sup>        | 2.400                                                                          |
| μ/mm <sup>-1</sup>                          | 12.180                                                                         |
| F(000)                                      | 1760.0                                                                         |
| Crystal size/mm <sup>3</sup>                | 0.29 × 0.12 × 0.07                                                             |
| Radiation                                   | MoKα (λ = 0.71073)                                                             |
| 2θ range for data collection/°              | 4.318 to 56.644                                                                |
| Index ranges                                | -16 ≤ h ≤ 16, -20 ≤ k ≤ 20, -19 ≤ l ≤ 15                                       |
| Reflections collected                       | 48435                                                                          |
| Independent reflections                     | 6653 [R <sub>int</sub> = 0.0872, R <sub>sigma</sub> = 0.0720]                  |
| Data/restraints/parameters                  | 6653/4/338                                                                     |
| Goodness-of-fit on F <sup>2</sup>           | 1.056                                                                          |
| Final R indexes [I ≥ 2σ (I)]                | R <sub>1</sub> = 0.0509, wR <sub>2</sub> = 0.0932                              |
| Final R indexes [all data]                  | R <sub>1</sub> = 0.0870, wR <sub>2</sub> = 0.1045                              |
| Largest diff. peak/hole / e Å <sup>-3</sup> | 2.26/-1.38                                                                     |

**Table 2S Fractional Atomic Coordinates (×10<sup>4</sup>) and Equivalent Isotropic Displacement Parameters (Å<sup>2</sup>×10<sup>3</sup>) for C1. U<sub>eq</sub> is defined as 1/3 of the trace of the orthogonalised U<sub>ij</sub> tensor.**

| Atom | x | y | z | U(eq) |
|------|---|---|---|-------|
|------|---|---|---|-------|

**Table 2S Fractional Atomic Coordinates ( $\times 10^4$ ) and Equivalent Isotropic Displacement Parameters ( $\text{\AA}^2 \times 10^3$ ) for C1.  $U_{\text{eq}}$  is defined as 1/3 of the trace of the orthogonalised  $U_{\text{ij}}$  tensor.**

| Atom | $x$       | $y$       | $z$       | $U(\text{eq})$ |
|------|-----------|-----------|-----------|----------------|
| U1   | 6063.4(3) | 3090.4(2) | 6202.4(2) | 31.58(11)      |
| U2   | 6348.7(3) | 5597.6(2) | 5246.8(2) | 24.01(10)      |
| O1   | 5578(5)   | 4319(4)   | 5416(5)   | 35.1(15)       |
| O2   | 6587(7)   | 2666(5)   | 5264(6)   | 60(2)          |
| O3   | 5582(7)   | 3432(4)   | 7198(5)   | 48.7(19)       |
| O4   | 6284(6)   | 5941(5)   | 6417(4)   | 40.8(17)       |
| O5   | 6554(6)   | 5319(4)   | 4095(4)   | 40.5(17)       |
| O6   | 5819(5)   | 6988(4)   | 4663(5)   | 39.3(17)       |
| O7   | 8071(5)   | 6539(5)   | 5544(5)   | 36.8(16)       |
| O8   | 7761(19)  | 1260(13)  | 4334(15)  | 236(10)        |
| N1_1 | 5307(7)   | 1573(5)   | 6398(5)   | 34.9(19)       |
| N2_1 | 5385(6)   | 1156(4)   | 7236(5)   | 26.7(16)       |
| N3_1 | 7188(6)   | 1626(5)   | 8136(5)   | 27.6(17)       |
| N4_1 | 7485(7)   | 2138(5)   | 7485(6)   | 41(2)          |
| C1_1 | 4892(8)   | 375(6)    | 7087(7)   | 38(2)          |
| C2_1 | 4461(9)   | 295(7)    | 6126(8)   | 45(3)          |
| C3_1 | 4735(9)   | 1047(7)   | 5733(7)   | 47(3)          |
| C4_1 | 8587(9)   | 2052(7)   | 7638(8)   | 49(3)          |
| C5_1 | 9012(9)   | 1479(7)   | 8393(8)   | 51(3)          |
| C6_1 | 8103(8)   | 1236(6)   | 8687(7)   | 38(2)          |
| C7_1 | 6000(7)   | 1540(6)   | 8130(6)   | 28(2)          |
| N1_2 | 7677(9)   | 8090(7)   | 6319(7)   | 60(3)          |
| N2_2 | 7370(7)   | 8326(6)   | 7130(6)   | 47(2)          |
| N3_2 | 8133(8)   | 7258(6)   | 8314(6)   | 50(2)          |
| N4_2 | 8840(8)   | 7655(7)   | 9080(7)   | 56(3)          |
| C1_2 | 7349(10)  | 9168(8)   | 7198(9)   | 58(3)          |
| C2_2 | 7630(11)  | 9522(8)   | 6438(9)   | 61(3)          |
| C3_2 | 7849(11)  | 8826(8)   | 5936(9)   | 60(3)          |
| C4_2 | 9687(11)  | 7112(9)   | 9401(8)   | 62(4)          |
| C5_2 | 9548(13)  | 6385(10)  | 8840(10)  | 79(4)          |
| C6_2 | 8542(12)  | 6514(10)  | 8164(10)  | 75(4)          |
| C7_2 | 7130(10)  | 7682(8)   | 7751(8)   | 57(3)          |
| O1_3 | 7774(7)   | 3816(6)   | 6858(8)   | 97(4)          |
| O2_3 | 8042(6)   | 4794(5)   | 5897(7)   | 68(3)          |
| C1_3 | 8410(8)   | 4289(7)   | 6545(9)   | 51(3)          |
| C2_3 | 9652(11)  | 4273(10)  | 7024(13)  | 106(6)         |

**Table 3S Anisotropic Displacement Parameters ( $\text{\AA}^2 \times 10^3$ ) for C1. The Anisotropic displacement factor exponent takes the form:  $-2\pi^2[h^2a^{*2}U_{11}+2hka^*b^*U_{12}+\dots]$ .**

| Atom | U <sub>11</sub> | U <sub>22</sub> | U <sub>33</sub> | U <sub>23</sub> | U <sub>13</sub> | U <sub>12</sub> |
|------|-----------------|-----------------|-----------------|-----------------|-----------------|-----------------|
| U1   | 26.25(19)       | 30.4(2)         | 35.5(2)         | 10.62(15)       | 3.23(15)        | 0.60(15)        |
| U2   | 19.02(17)       | 27.46(19)       | 23.96(17)       | 2.87(14)        | 2.68(12)        | -2.21(14)       |
| O1   | 25(3)           | 32(4)           | 45(4)           | 13(3)           | 2(3)            | -9(3)           |
| O2   | 72(6)           | 57(5)           | 63(5)           | 27(4)           | 37(5)           | 22(4)           |
| O3   | 69(5)           | 31(4)           | 44(4)           | 6(3)            | 12(4)           | 11(4)           |
| O4   | 38(4)           | 56(4)           | 25(3)           | -2(3)           | 2(3)            | -15(3)          |
| O5   | 54(5)           | 38(4)           | 31(4)           | -3(3)           | 14(3)           | -9(3)           |
| O6   | 27(4)           | 26(4)           | 56(4)           | 9(3)            | -4(3)           | -5(3)           |
| O7   | 27(4)           | 45(4)           | 38(4)           | 2(3)            | 7(3)            | -14(3)          |
| O8   | 250(20)         | 183(18)         | 230(20)         | 12(16)          | -16(18)         | -49(17)         |
| N1_1 | 44(5)           | 30(4)           | 26(4)           | 7(3)            | 0(4)            | -4(4)           |
| N2_1 | 22(4)           | 29(4)           | 27(4)           | 2(3)            | 4(3)            | -3(3)           |
| N3_1 | 24(4)           | 31(4)           | 24(4)           | 9(3)            | 1(3)            | -2(3)           |
| N4_1 | 22(4)           | 48(5)           | 48(5)           | 15(4)           | 1(4)            | 0(4)            |
| C1_1 | 31(5)           | 32(6)           | 46(6)           | 6(4)            | 3(5)            | -1(4)           |
| C2_1 | 47(7)           | 32(6)           | 54(7)           | -6(5)           | 7(5)            | -7(5)           |
| C3_1 | 60(8)           | 40(6)           | 32(6)           | 5(5)            | -2(5)           | -3(6)           |
| C4_1 | 31(6)           | 51(7)           | 66(8)           | 11(6)           | 16(5)           | 0(5)            |
| C5_1 | 28(6)           | 49(7)           | 68(8)           | 12(6)           | -5(5)           | 7(5)            |
| C6_1 | 33(6)           | 37(6)           | 38(6)           | 9(4)            | -2(5)           | 1(5)            |
| C7_1 | 27(5)           | 27(5)           | 30(5)           | 5(4)            | 7(4)            | 2(4)            |
| N1_2 | 66(7)           | 70(7)           | 47(6)           | -22(5)          | 22(5)           | -12(6)          |
| N2_2 | 43(5)           | 63(7)           | 32(5)           | -11(4)          | 2(4)            | 5(5)            |
| N3_2 | 47(6)           | 69(7)           | 39(5)           | -12(5)          | 19(5)           | -1(5)           |
| N4_2 | 40(6)           | 82(7)           | 46(6)           | -26(5)          | 12(5)           | -3(5)           |
| C1_2 | 48(7)           | 66(9)           | 53(8)           | -22(6)          | -2(6)           | 20(6)           |
| C2_2 | 65(9)           | 52(8)           | 57(8)           | -4(6)           | 1(6)            | 8(6)            |
| C3_2 | 67(9)           | 68(9)           | 50(7)           | -10(7)          | 22(6)           | -9(7)           |
| C4_2 | 49(8)           | 96(10)          | 37(6)           | -7(7)           | 4(6)            | 7(7)            |
| C5_2 | 83(11)          | 91(11)          | 63(9)           | -24(8)          | 20(8)           | 20(9)           |
| C6_2 | 65(9)           | 89(11)          | 64(9)           | -38(8)          | 3(7)            | 5(8)            |
| C7_2 | 43(7)           | 77(9)           | 47(7)           | -8(6)           | 3(6)            | 3(6)            |
| O1_3 | 45(5)           | 85(7)           | 128(9)          | 59(6)           | -35(5)          | -30(5)          |
| O2_3 | 40(5)           | 60(5)           | 96(7)           | 35(5)           | 2(4)            | 13(4)           |
| C1_3 | 20(5)           | 34(6)           | 85(9)           | 18(6)           | -12(5)          | -9(5)           |
| C2_3 | 44(8)           | 86(11)          | 165(17)         | 38(11)          | -13(10)         | -8(8)           |

**Table 4S Bond Lengths for C1.**

| Atom | Atom            | Length/Å  | Atom | Atom | Length/Å  |
|------|-----------------|-----------|------|------|-----------|
| U1   | U2 <sup>1</sup> | 3.7561(5) | N3_1 | C7_1 | 1.454(11) |
| U1   | O1              | 2.239(6)  | N4_1 | C4_1 | 1.312(12) |



**Table 4S Bond Lengths for C1.**

| Atom | Atom            | Length/Å  | Atom | Atom | Length/Å  |
|------|-----------------|-----------|------|------|-----------|
| U1   | O2              | 1.767(7)  | C1_1 | C2_1 | 1.354(14) |
| U1   | O3              | 1.769(7)  | C2_1 | C3_1 | 1.388(14) |
| U1   | O6 <sup>1</sup> | 2.318(6)  | C4_1 | C5_1 | 1.404(15) |
| U1   | N1_1            | 2.597(8)  | C5_1 | C6_1 | 1.342(14) |
| U1   | N4_1            | 2.649(8)  | N1_2 | N2_2 | 1.367(12) |
| U1   | O1_3            | 2.352(8)  | N1_2 | C3_2 | 1.320(15) |
| U2   | U2 <sup>1</sup> | 3.6965(7) | N2_2 | C1_2 | 1.326(14) |
| U2   | O1 <sup>1</sup> | 2.303(6)  | N2_2 | C7_2 | 1.430(15) |
| U2   | O1              | 2.257(6)  | N3_2 | N4_2 | 1.364(12) |
| U2   | O4              | 1.791(6)  | N3_2 | C6_2 | 1.311(16) |
| U2   | O5              | 1.795(6)  | N3_2 | C7_2 | 1.445(14) |
| U2   | O6              | 2.370(6)  | N4_2 | C4_2 | 1.328(15) |
| U2   | O7              | 2.515(6)  | C1_2 | C2_2 | 1.349(17) |
| U2   | O2_3            | 2.397(7)  | C2_2 | C3_2 | 1.375(16) |
| N1_1 | N2_1            | 1.355(10) | C4_2 | C5_2 | 1.383(17) |
| N1_1 | C3_1            | 1.321(12) | C5_2 | C6_2 | 1.371(18) |
| N2_1 | C1_1            | 1.360(11) | O1_3 | C1_3 | 1.239(13) |
| N2_1 | C7_1            | 1.446(11) | O2_3 | C1_3 | 1.220(12) |
| N3_1 | N4_1            | 1.353(10) | C1_3 | C2_3 | 1.496(16) |
| N3_1 | C6_1            | 1.340(11) |      |      |           |

<sup>1</sup>1-X,1-Y,1-Z**Table 5S Bond Angles for C1.**

| Atom | Atom | Atom            | Angle/°   | Atom            | Atom | Atom            | Angle/°    |
|------|------|-----------------|-----------|-----------------|------|-----------------|------------|
| O1   | U1   | U2 <sup>1</sup> | 34.77(15) | O5              | U2   | O2_3            | 85.5(3)    |
| O1   | U1   | O6 <sup>1</sup> | 71.2(2)   | O6              | U2   | U1 <sup>1</sup> | 36.27(15)  |
| O1   | U1   | N1_1            | 142.3(2)  | O6              | U2   | U2 <sup>1</sup> | 104.56(15) |
| O1   | U1   | N4_1            | 151.7(2)  | O6              | U2   | O7              | 70.0(2)    |
| O1   | U1   | O1_3            | 82.9(3)   | O6              | U2   | O2_3            | 138.9(3)   |
| O2   | U1   | U2 <sup>1</sup> | 99.6(2)   | O7              | U2   | U1 <sup>1</sup> | 105.87(16) |
| O2   | U1   | O1              | 92.2(3)   | O7              | U2   | U2 <sup>1</sup> | 174.49(17) |
| O2   | U1   | O3              | 175.0(3)  | O2_3            | U2   | U1 <sup>1</sup> | 168.4(2)   |
| O2   | U1   | O6 <sup>1</sup> | 94.1(3)   | O2_3            | U2   | U2 <sup>1</sup> | 116.3(2)   |
| O2   | U1   | N1_1            | 86.9(3)   | O2_3            | U2   | O7              | 69.1(3)    |
| O2   | U1   | N4_1            | 91.1(3)   | U1              | O1   | U2              | 139.3(3)   |
| O2   | U1   | O1_3            | 91.8(4)   | U1              | O1   | U2 <sup>1</sup> | 111.6(2)   |
| O3   | U1   | U2 <sup>1</sup> | 84.7(2)   | U2              | O1   | U2 <sup>1</sup> | 108.3(2)   |
| O3   | U1   | O1              | 92.8(3)   | U1 <sup>1</sup> | O6   | U2              | 106.5(2)   |
| O3   | U1   | O6 <sup>1</sup> | 87.8(3)   | N2_1            | N1_1 | U1              | 126.5(5)   |
| O3   | U1   | N1_1            | 89.4(3)   | C3_1            | N1_1 | U1              | 129.2(6)   |
| O3   | U1   | N4_1            | 84.3(3)   | C3_1            | N1_1 | N2_1            | 104.3(7)   |

**Table 5S Bond Angles for C1.**

| Atom            | Atom | Atom            | Angle/°    | Atom | Atom | Atom | Angle/°   |
|-----------------|------|-----------------|------------|------|------|------|-----------|
| O3              | U1   | O1_3            | 88.5(4)    | N1_1 | N2_1 | C1_1 | 111.7(7)  |
| O6 <sup>1</sup> | U1   | U2 <sup>1</sup> | 37.23(15)  | N1_1 | N2_1 | C7_1 | 119.6(7)  |
| O6 <sup>1</sup> | U1   | N1_1            | 71.2(2)    | C1_1 | N2_1 | C7_1 | 128.7(7)  |
| O6 <sup>1</sup> | U1   | N4_1            | 136.5(2)   | N4_1 | N3_1 | C7_1 | 119.7(7)  |
| O6 <sup>1</sup> | U1   | O1_3            | 153.6(3)   | C6_1 | N3_1 | N4_1 | 110.6(8)  |
| N1_1            | U1   | U2 <sup>1</sup> | 108.30(17) | C6_1 | N3_1 | C7_1 | 129.7(8)  |
| N1_1            | U1   | N4_1            | 66.0(2)    | N3_1 | N4_1 | U1   | 125.1(5)  |
| N4_1            | U1   | U2 <sup>1</sup> | 167.63(18) | C4_1 | N4_1 | U1   | 129.3(7)  |
| O1_3            | U1   | U2 <sup>1</sup> | 116.4(2)   | C4_1 | N4_1 | N3_1 | 105.6(8)  |
| O1_3            | U1   | N1_1            | 134.8(3)   | C2_1 | C1_1 | N2_1 | 106.5(9)  |
| O1_3            | U1   | N4_1            | 68.9(3)    | C1_1 | C2_1 | C3_1 | 105.5(9)  |
| U2 <sup>1</sup> | U2   | U1 <sup>1</sup> | 68.886(13) | N1_1 | C3_1 | C2_1 | 112.0(9)  |
| O1 <sup>1</sup> | U2   | U1 <sup>1</sup> | 33.66(14)  | N4_1 | C4_1 | C5_1 | 110.7(10) |
| O1              | U2   | U1 <sup>1</sup> | 105.04(15) | C6_1 | C5_1 | C4_1 | 104.9(9)  |
| O1              | U2   | U2 <sup>1</sup> | 36.27(15)  | N3_1 | C6_1 | C5_1 | 108.2(9)  |
| O1 <sup>1</sup> | U2   | U2 <sup>1</sup> | 35.43(14)  | N2_1 | C7_1 | N3_1 | 109.4(7)  |
| O1              | U2   | O1 <sup>1</sup> | 71.7(2)    | C3_2 | N1_2 | N2_2 | 103.2(10) |
| O1 <sup>1</sup> | U2   | O6              | 69.1(2)    | N1_2 | N2_2 | C7_2 | 119.2(10) |
| O1              | U2   | O6              | 140.8(2)   | C1_2 | N2_2 | N1_2 | 110.4(10) |
| O1              | U2   | O7              | 149.1(2)   | C1_2 | N2_2 | C7_2 | 130.4(10) |
| O1 <sup>1</sup> | U2   | O7              | 139.2(2)   | N4_2 | N3_2 | C7_2 | 120.7(10) |
| O1              | U2   | O2_3            | 80.2(2)    | C6_2 | N3_2 | N4_2 | 110.6(10) |
| O1 <sup>1</sup> | U2   | O2_3            | 151.4(3)   | C6_2 | N3_2 | C7_2 | 128.5(10) |
| O4              | U2   | U1 <sup>1</sup> | 98.0(2)    | C4_2 | N4_2 | N3_2 | 105.1(10) |
| O4              | U2   | U2 <sup>1</sup> | 94.6(2)    | N2_2 | C1_2 | C2_2 | 109.7(11) |
| O4              | U2   | O1              | 92.6(3)    | C1_2 | C2_2 | C3_2 | 102.9(11) |
| O4              | U2   | O1 <sup>1</sup> | 94.9(3)    | N1_2 | C3_2 | C2_2 | 113.7(11) |
| O4              | U2   | O5              | 173.8(3)   | N4_2 | C4_2 | C5_2 | 111.1(11) |
| O4              | U2   | O6              | 89.0(3)    | C6_2 | C5_2 | C4_2 | 104.2(12) |
| O4              | U2   | O7              | 84.3(3)    | N3_2 | C6_2 | C5_2 | 108.9(12) |
| O4              | U2   | O2_3            | 91.9(3)    | N2_2 | C7_2 | N3_2 | 113.4(10) |
| O5              | U2   | U1 <sup>1</sup> | 84.0(2)    | C1_3 | O1_3 | U1   | 135.9(8)  |
| O5              | U2   | U2 <sup>1</sup> | 91.6(2)    | C1_3 | O2_3 | U2   | 138.8(8)  |
| O5              | U2   | O1 <sup>1</sup> | 90.1(3)    | O1_3 | C1_3 | C2_3 | 118.5(11) |
| O5              | U2   | O1              | 92.6(3)    | O2_3 | C1_3 | O1_3 | 121.8(10) |
| O5              | U2   | O6              | 89.2(3)    | O2_3 | C1_3 | C2_3 | 119.6(11) |
| O5              | U2   | O7              | 89.5(3)    |      |      |      |           |

<sup>1</sup>1-X,1-Y,1-Z**Table 6S Hydrogen Bonds for C1.**

| D | H | A | d(D-H)/Å | d(H-A)/Å | d(D-A)/Å | D-H-A/° |
|---|---|---|----------|----------|----------|---------|
|---|---|---|----------|----------|----------|---------|

**Table 6S Hydrogen Bonds for C1.**

| D     | H               | A | d(D-H)/Å  | d(H-A)/Å | d(D-A)/Å  | D-H-A/°   |
|-------|-----------------|---|-----------|----------|-----------|-----------|
| O6H6A | N1_2            |   | 0.95(2)   | 2.40(4)  | 3.325(12) | 166(11)   |
| O7H7B | N1_2            |   | 0.95(2)   | 1.84(3)  | 2.774(12) | 168(11)   |
| O8H8A | O2              |   | 0.97(2)   | 2.296(8) | 3.12(3)   | 141.5(14) |
| O8H8B | O3 <sup>1</sup> |   | 0.964(19) | 2.816(7) | 3.54(2)   | 133.0(12) |

<sup>1</sup>+X,1/2-Y,-1/2+Z

**Table 7S Torsion Angles for C1.**

| A    | B    | C    | D    | Angle/°    | A    | B    | C    | D    | Angle/°    |
|------|------|------|------|------------|------|------|------|------|------------|
| U1   | N1_1 | N2_1 | C1_1 | 179.4(6)   | C6_1 | N3_1 | C7_1 | N2_1 | -113.4(10) |
| U1   | N1_1 | N2_1 | C7_1 | -4.0(11)   | C7_1 | N2_1 | C1_1 | C2_1 | -177.6(9)  |
| U1   | N1_1 | C3_1 | C2_1 | -178.8(7)  | C7_1 | N3_1 | N4_1 | U1   | 3.0(11)    |
| U1   | N4_1 | C4_1 | C5_1 | -180.0(7)  | C7_1 | N3_1 | N4_1 | C4_1 | -177.1(8)  |
| U1   | O1_3 | C1_3 | O2_3 | 35(2)      | C7_1 | N3_1 | C6_1 | C5_1 | 176.3(9)   |
| U1   | O1_3 | C1_3 | C2_3 | -149.0(11) | N1_2 | N2_2 | C1_2 | C2_2 | 0.5(13)    |
| U2   | O2_3 | C1_3 | O1_3 | 28(2)      | N1_2 | N2_2 | C7_2 | N3_2 | 74.2(13)   |
| U2   | O2_3 | C1_3 | C2_3 | -148.3(11) | N2_2 | N1_2 | C3_2 | C2_2 | -2.2(14)   |
| N1_1 | N2_1 | C1_1 | C2_1 | -1.4(11)   | N2_2 | C1_2 | C2_2 | C3_2 | -1.7(13)   |
| N1_1 | N2_1 | C7_1 | N3_1 | -63.9(10)  | N3_2 | N4_2 | C4_2 | C5_2 | 1.4(14)    |
| N2_1 | N1_1 | C3_1 | C2_1 | -1.0(12)   | N4_2 | N3_2 | C6_2 | C5_2 | 0.4(16)    |
| N2_1 | C1_1 | C2_1 | C3_1 | 0.8(12)    | N4_2 | N3_2 | C7_2 | N2_2 | 74.7(13)   |
| N3_1 | N4_1 | C4_1 | C5_1 | 0.1(12)    | N4_2 | C4_2 | C5_2 | C6_2 | -1.2(16)   |
| N4_1 | N3_1 | C6_1 | C5_1 | -1.0(11)   | C1_2 | N2_2 | C7_2 | N3_2 | -105.8(13) |
| N4_1 | N3_1 | C7_1 | N2_1 | 63.7(10)   | C1_2 | C2_2 | C3_2 | N1_2 | 2.5(15)    |
| N4_1 | C4_1 | C5_1 | C6_1 | -0.7(13)   | C3_2 | N1_2 | N2_2 | C1_2 | 1.0(13)    |
| C1_1 | N2_1 | C7_1 | N3_1 | 112.1(10)  | C3_2 | N1_2 | N2_2 | C7_2 | -179.0(10) |
| C1_1 | C2_1 | C3_1 | N1_1 | 0.1(13)    | C4_2 | C5_2 | C6_2 | N3_2 | 0.4(17)    |
| C3_1 | N1_1 | N2_1 | C1_1 | 1.5(11)    | C6_2 | N3_2 | N4_2 | C4_2 | -1.1(14)   |
| C3_1 | N1_1 | N2_1 | C7_1 | 178.1(8)   | C6_2 | N3_2 | C7_2 | N2_2 | -100.6(15) |
| C4_1 | C5_1 | C6_1 | N3_1 | 1.0(12)    | C7_2 | N2_2 | C1_2 | C2_2 | -179.5(11) |
| C6_1 | N3_1 | N4_1 | U1   | -179.4(6)  | C7_2 | N3_2 | N4_2 | C4_2 | -177.2(10) |
| C6_1 | N3_1 | N4_1 | C4_1 | 0.5(11)    | C7_2 | N3_2 | C6_2 | C5_2 | 176.1(12)  |

**Table 8S Hydrogen Atom Coordinates (Å×10<sup>4</sup>) and Isotropic Displacement Parameters (Å<sup>2</sup>×10<sup>3</sup>) for C1.**

| Atom | x | y | z | U(eq) |
|------|---|---|---|-------|
|------|---|---|---|-------|

**Table 8S Hydrogen Atom Coordinates ( $\text{\AA} \times 10^4$ ) and Isotropic Displacement Parameters ( $\text{\AA}^2 \times 10^3$ ) for C1.**

| Atom  | x         | y        | z        | U(eq)   |
|-------|-----------|----------|----------|---------|
| H6A   | 6360(80)  | 7360(70) | 5040(80) | 90(50)  |
| H7A   | 8370(100) | 6690(70) | 5030(60) | 80(40)  |
| H7B   | 8010(130) | 7100(30) | 5770(90) | 130(60) |
| H8A   | 7438.55   | 1825.02  | 4349.54  | 355     |
| H8B   | 7077.67   | 1020.96  | 3926.44  | 355     |
| H1_1  | 4858.18   | -26.7    | 7552.88  | 45      |
| H2_1  | 4064.83   | -166.92  | 5798.61  | 54      |
| H3_1  | 4539.14   | 1166.27  | 5078.33  | 56      |
| H4_1  | 9025.65   | 2333.01  | 7293.98  | 59      |
| H5_1  | 9759.77   | 1306.14  | 8635.33  | 62      |
| H6_1  | 8106.34   | 861.24   | 9188.12  | 46      |
| H7A_1 | 5930.6    | 1188.18  | 8664.73  | 33      |
| H7B_1 | 5684.13   | 2096.39  | 8199.23  | 33      |
| H1_2  | 7168.8    | 9468.49  | 7695     | 70      |
| H2_2  | 7666.82   | 10095.96 | 6289.9   | 73      |
| H3_2  | 8095.17   | 8868.56  | 5378.15  | 72      |
| H4_2  | 10293.47  | 7207.18  | 9931.84  | 75      |
| H5_2  | 10026.52  | 5915.62  | 8906.63  | 95      |
| H6_2  | 8205.48   | 6134.79  | 7678.16  | 90      |
| H7A_2 | 6630.63   | 7262.06  | 7366.57  | 68      |
| H7B_2 | 6732.67   | 7939.36  | 8182.74  | 68      |
| H2A_3 | 10069.59  | 4214.1   | 6547.52  | 159     |
| H2B_3 | 9817.74   | 3800.61  | 7461.07  | 159     |
| H2C_3 | 9864.72   | 4793.99  | 7372.3   | 159     |

### Calculations for $T_\infty$ of Catechol Oxidation.

**C1:** Calculation for finding molar absorption Co-efficient and Concentration (**M**)

Concentration is calculated using Beer Lambert's Equation

$$A = \epsilon cl$$

Were

A is the absorbance of 3,5DTBQ in a specific concentration.

$$A = 3.163$$

C- Concentration of the solution = 0.011678M

l - Path Length = 1 cm

$$\epsilon = A/Cl$$

$$= 3.163/0.011678$$

**Absorption Coefficient ( $\epsilon$ ) = 271.0368**

**Concentration of 3,5-DTBQ = Absorbance of 3,5-DTBQ from UV-Vis data /  $\epsilon$  (Molar Absorption Coefficient)**

**Average rate = slope of Concentration [M] vs Time (min)**

| Time (min) | Absorbance | Concentration |
|------------|------------|---------------|
| 0          | 0.2272     | 0.000838263   |
| 10         | 0.2581     | 0.000952269   |
| 20         | 0.2872     | 0.001059635   |
| 30         | 0.3485     | 0.001285803   |
| 40         | 0.3719     | 0.001372138   |
| 50         | 0.4003     | 0.001476921   |
| 60         | 0.4261     | 0.001572111   |
| 70         | 0.4668     | 0.001722275   |
| 80         | 0.4917     | 0.001814145   |
| 90         | 0.5158     | 0.001903063   |
| 100        | 0.5343     | 0.001971319   |
| 110        | 0.5584     | 0.002060237   |
| 120        | 0.582      | 0.00214731    |
|            |            |               |
|            | AVG Rate   | 1.10E-05      |

**SC1.** For Complex C1 at 25 °C in methanol as solvent.

### **Calculations for $T_{\infty}$ of 2-Aminophenol Oxidation**

**C3:** Calculation for finding molar absorption Co-efficient and Concentration (M)

Concentration is calculated using Beer Lambert's Equation

$$A = \epsilon cl$$

Were

A is the absorbance of 3,5DTBQ in a specific concentration.

$$A = 2.854$$

C- Concentration of the solution = 0.002 M

l - Path Length = 1 cm

$$\epsilon = A/Cl$$

**Absorption Coefficient ( $\epsilon$ ) = 1427**

**Concentration of 3,5-DTBQ = Absorbance of 3,5-DTBQ from UV-Vis data /  $\epsilon$  (Molar Absorption Coefficient)**

**Average rate = slope of Concentration [M] vs Time (min)**

| Time (Min) | Absorbance | Concentration |
|------------|------------|---------------|
| 0          | 0.014      | 9.81079E-06   |
| 10         | 0.04       | 2.80308E-05   |
| 20         | 0.078      | 5.46601E-05   |
| 30         | 0.125      | 8.75964E-05   |
| 40         | 0.171      | 0.000119832   |
| 50         | 0.214      | 0.000149965   |
| 60         | 0.258      | 0.000180799   |
| 70         | 0.294      | 0.000206027   |
| 80         | 0.331      | 0.000231955   |
| 90         | 0.359      | 0.000251577   |
| 100        | 0.391      | 0.000274001   |
| 110        | 0.42       | 0.000294324   |
| 120        | 0.45       | 0.000315347   |
|            |            |               |
|            | AVG Rate   | 2.64522E-06   |

**SC2. For Complex C2 at 25 °C in Water:MeOH as solvent.**

**Table 9S: Comparison of  $K_{cat}$  values for the oxidation of 3,5 di tert butyl catechol to 3,5 di tert butyl quinone.**

| Sl.No | Catalyst                                                                            | $K_{cat}$                        | Reference |
|-------|-------------------------------------------------------------------------------------|----------------------------------|-----------|
| 1     | 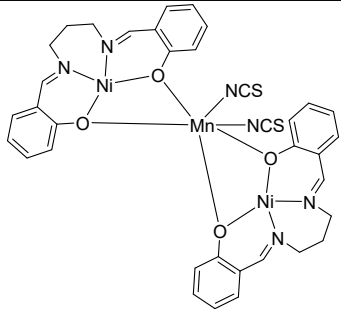   | 104.5 ( $hr^{-1}$ )              | 2         |
| 2     |   | $7.99 \times 10^2$ ( $h^{-1}$ )  | 3         |
| 3     |  | 835.2 ( $h^{-1}$ )               | 4         |
| 4     |  | 2.30 ( $min^{-1}$ )              | 5         |
| 5     |  | $1.729 \times 10^5$ ( $h^{-1}$ ) | 6         |

|   |  |                                           |           |
|---|--|-------------------------------------------|-----------|
| 6 |  | $3.8 \times 10^3 \text{ (h}^{-1}\text{)}$ | 7         |
| 7 |  | $4.0 \times 10^2 \text{ (h}^{-1}\text{)}$ | This work |

**Table 10S. Comparison of  $K_{\text{cat}}$  values for the oxidation of 2- Aminophenol to 2aminophenoxazine-3-one.**

| Sl.No | Catalyst | Kcat                                         | Reference |
|-------|----------|----------------------------------------------|-----------|
| 1     |          | $1.43 \times 10^3 \text{ (h}^{-1}\text{)}$   | 8         |
| 2     |          | $234 \times 10^{-5} \text{ (s}^{-1}\text{)}$ | 9         |
| 3     |          | $0.260 \times 10^5 \text{ (h}^{-1}\text{)}$  | 6         |



|   |                                                                                     |                                    |    |
|---|-------------------------------------------------------------------------------------|------------------------------------|----|
| 4 | 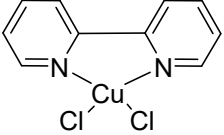   | $5.43 \times 10^3 (\text{h}^{-1})$ | 10 |
| 5 |    | $628 \times 10^4 (\text{h}^{-1})$  | 11 |
| 6 |    | $2.02 \times 10^2 (\text{h}^{-1})$ | 12 |
| 7 |   | $7.20 \times 10^2 (\text{h}^{-1})$ | 12 |
| 8 |  | $1.70 \times 10^1 (\text{h}^{-1})$ | 12 |
| 9 |  | $4.59 \times 10^3 (\text{h}^{-1})$ | 13 |

|    |                                                                                   |                                            |           |
|----|-----------------------------------------------------------------------------------|--------------------------------------------|-----------|
| 10 | 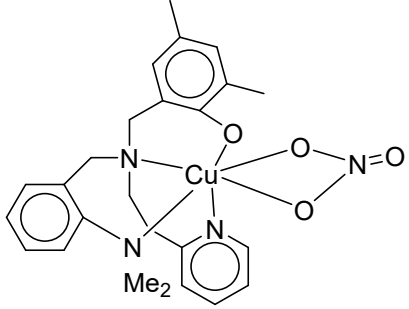 | $91.1 \times 10^4 \text{ (h}^{-1}\text{)}$ | 14        |
| 11 |  | $6.6 \times 10^1 \text{ (h}^{-1}\text{)}$  | This work |

## References

- 1 S. Trofimenko, *J Am Chem Soc*, 1970, **92**, 5118–5126.
- 2 P. Seth, L. K. Das, M. G. B. Drew and A. Ghosh, *Eur J Inorg Chem*, 2012, **2012**, 2232–2242.
- 3 S. Das, A. Sahu, M. Joshi, S. Paul, M. Shit, A. Roy Choudhury and B. Biswas, *ChemistrySelect*, 2018, **3**, 10774–10781.
- 4 M. S. Khan, M. Khalid, M. S. Ahmad, M. Shahid and M. Ahmad, *Research on Chemical Intermediates*, 2020, **46**, 2985–3006.
- 5 R. R. Tripathy, P. K. Deheri, P. Biswas, S. Jana and S. Sarkar, *J Mol Struct*, 2024, **1312**, 138576.
- 6 S. Reja, D. Sarkar, K. Sarkar, D. Mukherjee, T. K. S. Fayaz, P. Sanphui and R. K. Das, *Inorganica Chim Acta*, 2024, **560**, 121809.
- 7 S. Ghosh, A. K. Srivastava, M. Sharma and S. Pal, *ChemistrySelect*, 2022, **7**, e202200293.
- 8 S. Mukherjee, S. Roy, S. Mukherjee and B. Biswas, *J Mol Struct*, 2020, **1217**, 128348.
- 9 N. Podder and S. Mandal, *New Journal of Chemistry*, 2020, **44**, 12793–12805.
- 10 M. Garai, D. Dey, H. R. Yadav, A. R. Choudhury, M. Maji and B. Biswas, *ChemistrySelect*, 2017, **2**, 11040–11047.
- 11 A. S. Thennarasu, T. P. Mohammed and M. Sankaralingam, *New Journal of Chemistry*, 2022, **46**, 21684–21694.
- 12 A. Chatterjee, S. Khan and R. Ghosh, *Polyhedron*, 2019, **173**, 114151.

- 13 A. K. Maji, A. Chatterjee, S. Khan, B. K. Ghosh and R. Ghosh, *J Mol Struct*, 2017, **1146**, 821–827.
- 14 W. P. Sohtun, S. Muthuramalingam, M. Sankaralingam, M. Velusamy and R. Mayilmurugan, *J Inorg Biochem*, 2021, **216**, 111313.
